# Supplementary material for: Transcriptome of nasopharyngeal samples from COVID-19 patients and a comparative analysis with other SARS-CoV-2 infection models reveal disparate host responses against SARS-CoV-2
Source: Springer Nature journal article supplement (doi:10.1186/s12967-020-02695-0), 2021-01-07
Supplement: MOESM1 [file 18747950]

Additional file 1: Isolate-wise variation information of the four SARS-CoV-2 isolates used in this study.

| Isolate S2     |              |          |                                             |                         |                         |                                     |                                    |                       |
|----------------|--------------|----------|---------------------------------------------|-------------------------|-------------------------|-------------------------------------|------------------------------------|-----------------------|
| Start position | End position | Base     | Ref base                                    | Ref annotation position | Annotation Type         | Protein.Position.Amino acids change | Gene.Position.Codons               | Impact                |
| 29742          | 29742        | A        | REF:G                                       | START:3'UTR             | downstream gene variant | QHI42199.1                          | gene-ORF10                         | MODIFIER; DISTANCE=68 |
| 7              | 7            | C        | REF:G                                       | START:5'UTR             | intergenic variant      | -                                   | -                                  | MODIFIER              |
| 12             | 12           | T        | REF:A                                       | START:5'UTR             | intergenic variant      | -                                   | -                                  | MODIFIER              |
| 29893          | 29893        | G        | REF:A                                       | START:3'UTR             | intergenic variant      | -                                   | -                                  | MODIFIER              |
| 29895          | 29895        | T        | REF:A                                       | START:3'UTR             | intergenic variant      | -                                   | -                                  | MODIFIER              |
| 29896          | 29896        | C        | REF:A                                       | START:3'UTR             | intergenic variant      | -                                   | -                                  | MODIFIER              |
| 29897          | 29897        | G        | REF:A                                       | START:3'UTR             | intergenic variant      | -                                   | -                                  | MODIFIER              |
| 29898          | 29898        | G        | REF:A                                       | START:3'UTR             | intergenic variant      | -                                   | -                                  | MODIFIER              |
| 29901          | 29901        | G        | REF:A                                       | START:3'UTR             | intergenic variant      | -                                   | -                                  | MODIFIER              |
| 2              | 2            | TA       | REF:T                                       | START:5'UTR             | intergenic variant      | -                                   | -                                  | MODIFIER              |
| 9              | 9            | TTTTCGC  | REF:T                                       | START:5'UTR             | intergenic variant      | -                                   | -                                  | MODIFIER              |
| 29864          | 29891        | G        | REF:GAATG<br>ACAAAAAA<br>AAAAAAA<br>AAAAAAA | START:3'UTR             | intergenic variant      | -                                   | -                                  | MODIFIER              |
| 29903          | 29903        | GCCGTCGT | REF:A                                       | START:3'UTR             | intergenic variant      | -                                   | -                                  | MODIFIER              |
| 10329          | 10329        | G        | REF:A                                       | START:gene-<br>orf1ab   | missense variant        | QHD43415.<br>1:p.3355D><br>G        | gene-<br>orf1ab:c.100<br>64gAt>gGt | MODERATE              |
| 28144          | 28144        | C        | REF:T                                       | START:gene-<br>ORF8     | missense variant        | QHD43422.<br>1:p.84L>S              | gene-<br>ORF8:c.251t<br>Ta>tCa     | MODERATE              |
| 28878          | 28878        | A        | REF:G                                       | START:gene-<br>N        | missense variant        | QHD43423.<br>2:p.202S>N             | gene-<br>N:c.605aGt><br>aAt        | MODERATE              |
| 29392          | 29392        | T        | REF:G                                       | START:gene-<br>N        | missense variant        | QHD43423.<br>2:p.373K>N             | gene-<br>N:c.1119aaG<br>>aaT       | MODERATE              |

|       |       |   |       |                       |                       |                        |                                    |     |
|-------|-------|---|-------|-----------------------|-----------------------|------------------------|------------------------------------|-----|
| 601   | 601   | T | REF:C | START:gene-<br>orf1ab | synonymous<br>variant | QHD43415.<br>1:p.112G  | gene-<br>orf1ab:c.336<br>ggC>ggT   | LOW |
| 8782  | 8782  | T | REF:C | START:gene-<br>orf1ab | synonymous<br>variant | QHD43415.<br>1:p.2839S | gene-<br>orf1ab:c.851<br>7agC>agT  | LOW |
| 15324 | 15324 | T | REF:C | START:gene-<br>orf1ab | synonymous<br>variant | QHD43415.<br>1:p.5020N | gene-<br>orf1ab:c.150<br>60aaC>aaT | LOW |
| 22468 | 22468 | T | REF:G | START:gene-<br>S      | synonymous<br>variant | QHD43416.<br>1:p.302T  | gene-<br>S:c.906acG><br>acT        | LOW |

### Isolate S3

| Start position | End position | Base | Ref base                                    | Ref annotation position | Annotation Type            | Protein.Position. Amino acids change | Gene.Position. Codons              | Impact                   |
|----------------|--------------|------|---------------------------------------------|-------------------------|----------------------------|--------------------------------------|------------------------------------|--------------------------|
| 29742          | 29742        | A    | REF:G                                       | START:3'UTR             | downstream<br>gene variant | QHI42199.1                           | gene-ORF10                         | MODIFIER;<br>DISTANCE=68 |
| 1              | 12           | -    | REF:ATTAA<br>AGGTTTA                        | START:5'UTR             | intergenic<br>variant      | -                                    | -                                  | MODIFIER                 |
| 29870          | 29903        | C    | REF:CAAAA<br>AAAAAAAA<br>AAAAAAAA<br>AAAAAA | START:3'UTR             | intergenic<br>variant      | -                                    | -                                  | MODIFIER                 |
| 10329          | 10329        | G    | REF:A                                       | START:gene-<br>orf1ab   | missense<br>variant        | QHD43415.<br>1:p.3355D><br>G         | gene-<br>orf1ab:c.100<br>64gAt>gGt | MODERATE                 |
| 28144          | 28144        | C    | REF:T                                       | START:gene-<br>ORF8     | missense<br>variant        | QHD43422.<br>1:p.84L>S               | gene-<br>ORF8:c.251t<br>Ta>tCa     | MODERATE                 |
| 28878          | 28878        | A    | REF:G                                       | START:gene-<br>N        | missense<br>variant        | QHD43423.<br>2:p.202S>N              | gene-<br>N:c.605aGt><br>aAt        | MODERATE                 |
| 29392          | 29392        | T    | REF:G                                       | START:gene-<br>N        | missense<br>variant        | QHD43423.<br>2:p.373K>N              | gene-<br>N:c.1119aaG<br>>aaT       | MODERATE                 |
| 601            | 601          | T    | REF:C                                       | START:gene-<br>orf1ab   | synonymous<br>variant      | QHD43415.<br>1:p.112G                | gene-<br>orf1ab:c.336<br>ggC>ggT   | LOW                      |
| 8782           | 8782         | T    | REF:C                                       | START:gene-<br>orf1ab   | synonymous<br>variant      | QHD43415.<br>1:p.2839S               | gene-<br>orf1ab:c.851<br>7agC>agT  | LOW                      |

|       |       |   |       |                       |                       |                        |                                    |     |
|-------|-------|---|-------|-----------------------|-----------------------|------------------------|------------------------------------|-----|
| 15324 | 15324 | T | REF:C | START:gene-<br>orf1ab | synonymous<br>variant | QHD43415.<br>1:p.5020N | gene-<br>orf1ab:c.150<br>60aaC>aaT | LOW |
| 22468 | 22468 | T | REF:G | START:gene-<br>S      | synonymous<br>variant | QHD43416.<br>1:p.302T  | gene-<br>S:c.906acG><br>acT        | LOW |

## Isolate S4

| Start position | End position | Base | Ref base | Ref annotation position | Annotation Type            | Protein.Position.Amino acids change | Gene.Position.Codons | Impact                   |
|----------------|--------------|------|----------|-------------------------|----------------------------|-------------------------------------|----------------------|--------------------------|
| 29742          | 29742        | A    | REF:G    | START:3'UTR             | downstream<br>gene variant | QHI42199.1                          | gene-ORF10           | MODIFIER;<br>DISTANCE=68 |
| 4              | 4            | T    | REF:A    | START:5'UTR             | intergenic<br>variant      | -                                   | -                    | MODIFIER                 |
| 13             | 13           | C    | REF:T    | START:5'UTR             | intergenic<br>variant      | -                                   | -                    | MODIFIER                 |
| 29870          | 29870        | G    | REF:C    | START:3'UTR             | intergenic<br>variant      | -                                   | -                    | MODIFIER                 |
| 29872          | 29872        | T    | REF:A    | START:3'UTR             | intergenic<br>variant      | -                                   | -                    | MODIFIER                 |
| 29873          | 29873        | C    | REF:A    | START:3'UTR             | intergenic<br>variant      | -                                   | -                    | MODIFIER                 |
| 29874          | 29874        | G    | REF:A    | START:3'UTR             | intergenic<br>variant      | -                                   | -                    | MODIFIER                 |
| 29875          | 29875        | G    | REF:A    | START:3'UTR             | intergenic<br>variant      | -                                   | -                    | MODIFIER                 |
| 29878          | 29878        | T    | REF:A    | START:3'UTR             | intergenic<br>variant      | -                                   | -                    | MODIFIER                 |
| 29880          | 29880        | G    | REF:A    | START:3'UTR             | intergenic<br>variant      | -                                   | -                    | MODIFIER                 |
| 29882          | 29882        | G    | REF:A    | START:3'UTR             | intergenic<br>variant      | -                                   | -                    | MODIFIER                 |
| 29883          | 29883        | T    | REF:A    | START:3'UTR             | intergenic<br>variant      | -                                   | -                    | MODIFIER                 |
| 29884          | 29884        | C    | REF:A    | START:3'UTR             | intergenic<br>variant      | -                                   | -                    | MODIFIER                 |
| 29885          | 29885        | G    | REF:A    | START:3'UTR             | intergenic<br>variant      | -                                   | -                    | MODIFIER                 |
| 29886          | 29886        | T    | REF:A    | START:3'UTR             | intergenic<br>variant      | -                                   | -                    | MODIFIER                 |
| 29887          | 29887        | G    | REF:A    | START:3'UTR             | intergenic<br>variant      | -                                   | -                    | MODIFIER                 |
| 29888          | 29888        | T    | REF:A    | START:3'UTR             | intergenic<br>variant      | -                                   | -                    | MODIFIER                 |
| 29890          | 29890        | G    | REF:A    | START:3'UTR             | intergenic<br>variant      | -                                   | -                    | MODIFIER                 |
| 29891          | 29891        | G    | REF:A    | START:3'UTR             | intergenic<br>variant      | -                                   | -                    | MODIFIER                 |

|       |       |                           |         |                       |                       |                              |                                    |          |
|-------|-------|---------------------------|---------|-----------------------|-----------------------|------------------------------|------------------------------------|----------|
| 29892 | 29892 | G                         | REF:A   | START:3'UTR           | intergenic variant    | -                            | -                                  | MODIFIER |
| 29896 | 29896 | G                         | REF:A   | START:3'UTR           | intergenic variant    | -                            | -                                  | MODIFIER |
| 29898 | 29898 | G                         | REF:A   | START:3'UTR           | intergenic variant    | -                            | -                                  | MODIFIER |
| 29900 | 29900 | G                         | REF:A   | START:3'UTR           | intergenic variant    | -                            | -                                  | MODIFIER |
| 2     | 2     | TTTCAAAG<br>ATCAAGTC<br>A | REF:T   | START:5'UTR           | intergenic variant    | -                            | -                                  | MODIFIER |
| 29901 | 29903 | A                         | REF:AAA | START:3'UTR           | intergenic variant    | -                            | -                                  | MODIFIER |
| 10329 | 10329 | G                         | REF:A   | START:gene-<br>orf1ab | missense<br>variant   | QHD43415.<br>1:p.3355D><br>G | gene-<br>orf1ab:c.100<br>64gAt>gGt | MODERATE |
| 12119 | 12119 | T                         | REF:C   | START:gene-<br>orf1ab | missense<br>variant   | QHD43415.<br>1:p.3952P>S     | gene-<br>orf1ab:c.118<br>54Cca>Tca | MODERATE |
| 19414 | 19414 | A                         | REF:G   | START:gene-<br>orf1ab | missense<br>variant   | QHD43415.<br>1:p.6384V>I     | gene-<br>orf1ab:c.191<br>50Gta>Ata | MODERATE |
| 28144 | 28144 | C                         | REF:T   | START:gene-<br>ORF8   | missense<br>variant   | QHD43422.<br>1:p.84L>S       | gene-<br>ORF8:c.251t<br>Ta>tCa     | MODERATE |
| 28878 | 28878 | A                         | REF:G   | START:gene-<br>N      | missense<br>variant   | QHD43423.<br>2:p.202S>N      | gene-<br>N:c.605aGt><br>aAt        | MODERATE |
| 280   | 280   | T                         | REF:C   | START:gene-<br>orf1ab | synonymous<br>variant | QHD43415.<br>1:p.5V          | gene-<br>orf1ab:c.15g<br>tC>gtT    | LOW      |
| 8782  | 8782  | T                         | REF:C   | START:gene-<br>orf1ab | synonymous<br>variant | QHD43415.<br>1:p.2839S       | gene-<br>orf1ab:c.851<br>7agC>agT  | LOW      |
| 10870 | 10870 | T                         | REF:G   | START:gene-<br>orf1ab | synonymous<br>variant | QHD43415.<br>1:p.3535L       | gene-<br>orf1ab:c.106<br>05ctG>ctT | LOW      |
| 15324 | 15324 | T                         | REF:C   | START:gene-<br>orf1ab | synonymous<br>variant | QHD43415.<br>1:p.5020N       | gene-<br>orf1ab:c.150<br>60aaC>aaT | LOW      |
| 22468 | 22468 | T                         | REF:G   | START:gene-<br>S      | synonymous<br>variant | QHD43416.<br>1:p.302T        | gene-<br>S:c.906acG><br>acT        | LOW      |

## Isolate S9

| Start position | End position | Base          | Ref base                                         | Ref annotation position | Annotation Type         | Protein.Position.Amino acids change | Gene.Position.Codons               | Impact                   |
|----------------|--------------|---------------|--------------------------------------------------|-------------------------|-------------------------|-------------------------------------|------------------------------------|--------------------------|
| 29742          | 29742        | A             | REF:G                                            | START:3'UTR             | downstream gene variant | QHI42199.1                          | gene-ORF10                         | MODIFIER;<br>DISTANCE=68 |
| 29856          | 29856        | A             | REF:T                                            | START:3'UTR             | intergenic variant      | -                                   | -                                  | MODIFIER                 |
| 29858          | 29858        | A             | REF:T                                            | START:3'UTR             | intergenic variant      | -                                   | -                                  | MODIFIER                 |
| 29895          | 29895        | T             | REF:A                                            | START:3'UTR             | intergenic variant      | -                                   | -                                  | MODIFIER                 |
| 29897          | 29897        | G             | REF:A                                            | START:3'UTR             | intergenic variant      | -                                   | -                                  | MODIFIER                 |
| 29898          | 29898        | T             | REF:A                                            | START:3'UTR             | intergenic variant      | -                                   | -                                  | MODIFIER                 |
| 29901          | 29901        | G             | REF:A                                            | START:3'UTR             | intergenic variant      | -                                   | -                                  | MODIFIER                 |
| 1              | 14           | -             | REF:ATTAA<br>AGGTTTAT<br>A                       | START:5'UTR             | intergenic variant      | -                                   | -                                  | MODIFIER                 |
| 29864          | 29893        | T             | REF:GAATG<br>ACAAAAAA<br>AAAAAAA<br>AAAAAAA<br>A | START:3'UTR             | intergenic variant      | -                                   | -                                  | MODIFIER                 |
| 29903          | 29903        | GCGTCGTG<br>T | REF:A                                            | START:3'UTR             | intergenic variant      | -                                   | -                                  | MODIFIER                 |
| 10323          | 10323        | G             | REF:A                                            | START:gene-<br>orf1ab   | missense variant        | QHD43415.<br>1:p.3353K>R            | gene-<br>orf1ab:c.100<br>58aAg>aGg | MODERATE                 |
| 25505          | 25505        | T             | REF:A                                            | START:gene-<br>ORF3a    | missense variant        | QHD43417.<br>1:p.38Q>L              | gene-<br>ORF3a:c.113<br>cAa>cTa    | MODERATE                 |
| 28087          | 28087        | T             | REF:C                                            | START:gene-<br>ORF8     | missense variant        | QHD43422.<br>1:p.65A>V              | gene-<br>ORF8:c.194g<br>Ct>gTt     | MODERATE                 |
| 28144          | 28144        | C             | REF:T                                            | START:gene-<br>ORF8     | missense variant        | QHD43422.<br>1:p.84L>S              | gene-<br>ORF8:c.251t<br>Ta>tCa     | MODERATE                 |
| 28878          | 28878        | A             | REF:G                                            | START:gene-<br>N        | missense variant        | QHD43423.<br>2:p.202S>N             | gene-<br>N:c.605aGt><br>aAt        | MODERATE                 |
| 8782           | 8782         | T             | REF:C                                            | START:gene-<br>orf1ab   | synonymous variant      | QHD43415.<br>1:p.2839S              | gene-<br>orf1ab:c.851<br>7agC>agT  | LOW                      |
| 22468          | 22468        | T             | REF:G                                            | START:gene-<br>S        | synonymous variant      | QHD43416.<br>1:p.302T               | gene-<br>S:c.906acG><br>acT        | LOW                      |

|       |       |   |       |                  |                       |                       |                              |     |
|-------|-------|---|-------|------------------|-----------------------|-----------------------|------------------------------|-----|
| 23320 | 23320 | T | REF:C | START:gene-<br>S | synonymous<br>variant | QHD43416.<br>1:p.586D | gene-<br>S:c.1758gaC<br>>gaT | LOW |
|-------|-------|---|-------|------------------|-----------------------|-----------------------|------------------------------|-----|
