# Supplementary material for: Transcriptome of nasopharyngeal samples from COVID-19 patients and a comparative analysis with other SARS-CoV-2 infection models reveal disparate host responses against SARS-CoV-2
Source: Springer Nature journal article supplement (doi:10.1186/s12967-020-02695-0), 2021-01-07
Supplement: MOESM4 [file 18747950]

## Additional file 4 : Differentially expressed genes found in the nasal samples of COVID-19 patients.

| Up-regulated | Down-regulated | Differentially expressed |
|--------------|----------------|--------------------------|
| RNA5S14      | LINC00963      | RNA5S14                  |
| RNA5S11      | ADGRG1         | RNA5S11                  |
| RNA5S8       | SRSF5          | RNA5S8                   |
| RNA5S1       | ACTN4          | RNA5S1                   |
| RNA5S10      | EWSR1          | RNA5S10                  |
| RNA5S13      | HK1            | RNA5S13                  |
| RNA5S15      | TMED2          | RNA5S15                  |
| RNA5S2       | CCZ1B          | RNA5S2                   |
| RNA5S16      | PSMD2          | RNA5S16                  |
| RNA5S3       | VAMP3          | RNA5S3                   |
| RNA5S6       | CTNND1         | RNA5S6                   |
| RNA5S17      | ARRDC3         | RNA5S17                  |
| RNA5S7       | RDH10          | RNA5S7                   |
| RNA5S12      | EIF3CL         | RNA5S12                  |
| RNA5S5       | PRKAR1A        | RNA5S5                   |
| RNA5S4       | PPP2CB         | RNA5S4                   |
| RNU1-28P     | TSPYL1         | RNU1-28P                 |
| RNVU1-18     | SRP9           | RNVU1-18                 |
| RNU1-4       | SMARCA2        | RNU1-4                   |
| RNVU1-29     | GLUL           | RNVU1-29                 |
| RNU1-2       | RBM25          | RNU1-2                   |
| RNU1-1       | TNFRSF21       | RNU1-1                   |
| RNU1-27P     | SELENBP1       | RNU1-27P                 |
| RNU1-3       | DHCR24         | RNU1-3                   |
| RNVU1-7      | MAT2A          | RNVU1-7                  |
| RNY1         | EIF3C          | RNY1                     |
| RNU4-2       | SCARB2         | RNU4-2                   |
| RNA5S9       | TMPRSS4        | RNA5S9                   |
| FP671120.2   | EIF4G1         | FP671120.2               |
| CR392039.1   | ENC1           | CR392039.1               |
| VTRNA1-1     | HNRNPH1        | VTRNA1-1                 |
| RNA5SP370    | WDR1           | RNA5SP370                |
| FP236383.6   | ADSS2          | FP236383.6               |
| RNA5SP202    | TMEM123        | RNA5SP202                |
| RNVU1-28     | IL33           | RNVU1-28                 |
| CDR1         | CCZ1           | CDR1                     |
| SNORA73B     | FBXL5          | SNORA73B                 |
| RNU1-11P     | ZBTB7A         | RNU1-11P                 |
| RNY4         | HNRNPK         | RNY4                     |
| FP236383.1   | PLEKHB2        | FP236383.1               |
| RNA5SP389    | HNRNPU         | RNA5SP389                |
| RNU4-1       | ARL8B          | RNU4-1                   |
| FP236383.9   | DHX15          | FP236383.9               |
| H4C5         | UBQLN1         | H4C5                     |
| MIR3648-1    | ANXA7          | MIR3648-1                |
| SMR3B        | NDRG2          | SMR3B                    |
| H4C11        | TOMM20         | H4C11                    |
| RNA5-8SN2    | GANAB          | RNA5-8SN2                |
| RNA5-8SN3    | CTBP2          | RNA5-8SN3                |
| FP671120.4   | CBWD6          | FP671120.4               |
| RNA5-8SN1    | ITGB1          | RNA5-8SN1                |
| FP236383.3   | ASPH           | FP236383.3               |
| MIR3648-2    | ATP8B1         | MIR3648-2                |
| FP671120.1   | PFN2           | FP671120.1               |
| FP236383.10  | DDB1           | FP236383.10              |
| RN7SL5P      | ARGLU1         | RN7SL5P                  |
| RNA28S5      | SF3B1          | RNA28S5                  |
| PRB4         | ANPEP          | PRB4                     |

Table S5

|              |         |              |
|--------------|---------|--------------|
| PRB3         | DDX1    | PRB3         |
| RNA5SP298    | NCSTN   | RNA5SP298    |
| FP236383.5   | DNAJC10 | FP236383.5   |
| FP236383.4   | DDX5    | FP236383.4   |
| FP236383.12  | IFT57   | FP236383.12  |
| FP671120.7   | PGK1    | FP671120.7   |
| RN7SL4P      | MIA3    | RN7SL4P      |
| RNA5SP226    | SDC4    | RNA5SP226    |
| RN7SL752P    | VPS35   | RN7SL752P    |
| RNY3         | GALNT7  | RNY3         |
| AC079601.1   | NAP1L4  | AC079601.1   |
| RNA5SP145    | SRSF10  | RNA5SP145    |
| RNA5SP149    | COPB1   | RNA5SP149    |
| RNA5SP429    | DDX17   | RNA5SP429    |
| AL135938.1   | RBM39   | AL135938.1   |
| RNA5SP74     | TAX1BP1 | RNA5SP74     |
| CRNN         | ANKRD12 | CRNN         |
| RNY3P1       | LMBRD1  | RNY3P1       |
| FAM27E2      | CALM2   | FAM27E2      |
| FP236383.7   | SLC37A3 | FP236383.7   |
| RN7SL396P    | RDX     | RN7SL396P    |
| FP671120.5   | ABCD3   | FP671120.5   |
| H1-4         | CKAP4   | H1-4         |
| AL162581.1   | TMEM41B | AL162581.1   |
| CRCT1        | NFE2L1  | CRCT1        |
| RNA5SP335    | EPRS1   | RNA5SP335    |
| RNA5-8SP6    | UBE2Q1  | RNA5-8SP6    |
| AC024051.11  | ERBB3   | AC024051.11  |
| AC024051.5   | DIMT1   | AC024051.5   |
| AC024051.12  | RAC1    | AC024051.12  |
| AC024051.1   | CALM1   | AC024051.1   |
| FP236383.8   | PRSS23  | FP236383.8   |
| RNU2-1       | SFPQ    | RNU2-1       |
| AC024051.2   | EXOC3   | AC024051.2   |
| SNORD17      | ADAM9   | SNORD17      |
| AC024051.7   | XPO1    | AC024051.7   |
| AC024051.10  | ACSL5   | AC024051.10  |
| AC024051.3   | CCT2    | AC024051.3   |
| AC024051.8   | KDELRL1 | AC024051.8   |
| AC024051.6   | PCMTD2  | AC024051.6   |
| RNA5SP161    | ACTR2   | RNA5SP161    |
| AC024051.4   | ALDH3A2 | AC024051.4   |
| AL161626.1   | RTF1    | AL161626.1   |
| LINC01783    | SH3YL1  | LINC01783    |
| CXCL11       | ATP6V1A | CXCL11       |
| H4C8         | CBX3    | H4C8         |
| FABP6-AS1    | MAP2K2  | FABP6-AS1    |
| RN7SKP71     | CLSTN1  | RN7SKP71     |
| RN7SKP203    | ZDHHC13 | RN7SKP203    |
| UBQLNL       | LAPTM4A | UBQLNL       |
| CTA-384D8.31 | ANXA2   | CTA-384D8.31 |
| AC092299.7   | SEPTIN2 | AC092299.7   |
| BPIFB2       | SLC6A6  | BPIFB2       |
| SIGLEC16     | CLTC    | SIGLEC16     |
| TRPV1        | STIM2   | TRPV1        |
| H2BC8        | RCBTB1  | H2BC8        |
| FAM27E3      | PSMD14  | FAM27E3      |
| RNA5SP481    | PCYOX1  | RNA5SP481    |
| H4C2         | SACM1L  | H4C2         |
| LINC02176    | ST14    | LINC02176    |
| MIR663AHG    | ACVR1B  | MIR663AHG    |

Table S5

|            |           |            |
|------------|-----------|------------|
| SCARNA7    | SEC61A1   | SCARNA7    |
| C1QB       | SYNGR2    | C1QB       |
| GDF5       | IL13RA1   | GDF5       |
| SIGLEC1    | CAPZA2    | SIGLEC1    |
| CA6        | XPO7      | CA6        |
| SCARNA6    | CANX      | SCARNA6    |
| MZB1       | GALNT1    | MZB1       |
| CD8A       | SDC1      | CD8A       |
| HTN3       | MFSD14B   | HTN3       |
| AC087276.3 | DDX18     | AC087276.3 |
| MOCS1      | CCNDBP1   | MOCS1      |
| AC084082.1 | ADGRF1    | AC084082.1 |
| RN7SKP80   | UBE2N     | RN7SKP80   |
| CARNS1     | MDFIC     | CARNS1     |
| MT-RNR2    | SSR1      | MT-RNR2    |
| SIGLEC11   | CNOT8     | SIGLEC11   |
| AP001462.1 | SDCBP     | AP001462.1 |
| THSD4-AS1  | RAB5C     | THSD4-AS1  |
| AL354919.1 | ERP44     | AL354919.1 |
| STATH      | MPZL2     | STATH      |
| AL137779.1 | HMGXB3    | AL137779.1 |
| BSN        | RSRC2     | BSN        |
| CYP2D8P    | KPNA1     | CYP2D8P    |
| H2AC8      | HSPA9     | H2AC8      |
| SKAP2      | AKR1C3    | SKAP2      |
| SNX29P1    | ALCAM     | SNX29P1    |
| G2E3-AS1   | CTNNB1    | G2E3-AS1   |
| AC016168.4 | GAPDH     | AC016168.4 |
| IKZF3      | GSN       | IKZF3      |
| PPP1R1A    | TFCP2L1   | PPP1R1A    |
| H2BC4      | PDCD4     | H2BC4      |
| CHAC1      | DYNLT1    | CHAC1      |
| AL596325.2 | QSOX1     | AL596325.2 |
| MAP1LC3C   | GOLGA1    | MAP1LC3C   |
| HOPX       | ESYT2     | HOPX       |
| IFIT2      | HSP90AA1  | IFIT2      |
| RN7SKP255  | RBBP9     | RN7SKP255  |
| CXCL10     | AAGAB     | CXCL10     |
| KRT78      | CD46      | KRT78      |
| AC068987.2 | TAP1      | AC068987.2 |
| RN7SL391P  | HIGD1A    | RN7SL391P  |
| ARHGAP40   | CLDN7     | ARHGAP40   |
| ADRA2A     | GM2A      | ADRA2A     |
| CNFN       | KIF21A    | CNFN       |
| TERB1      | MARK3     | TERB1      |
| TRIM34     | PAICS     | TRIM34     |
| SLC9C2     | NFKB1     | SLC9C2     |
| CACNG8     | HNRNPA2B1 | CACNG8     |
| CLVS1      | EIF5B     | CLVS1      |
| H1-2       | WEE1      | H1-2       |
| SPRR2D     | CDC42SE2  | SPRR2D     |
| SLC23A3    | USP48     | SLC23A3    |
| AC005921.4 | ANKRD36B  | AC005921.4 |
| LMX1B      | HNRNPL    | LMX1B      |
| PGBD5      | RCAN3     | PGBD5      |
| C8orf34    | ALDH3A1   | C8orf34    |
| SSPO       | SRPRA     | SSPO       |
| FLG2       | FMO3      | FLG2       |
| AP000708.1 | CLCN3     | AP000708.1 |
| AC006435.4 | UGP2      | AC006435.4 |
| H2BC5      | NIPAL2    | H2BC5      |

Table S5

|            |           |            |
|------------|-----------|------------|
| FGF17      | NCKAP1    | FGF17      |
| ABCA8      | RAB5A     | ABCA8      |
| LINC01562  | SLC38A2   | LINC01562  |
| FXVD6      | EIF1AX    | FXVD6      |
| ARHGAP15   | DECR1     | ARHGAP15   |
| THRB-IT1   | SLC25A3   | THRB-IT1   |
| LINC01460  | SLC44A2   | LINC01460  |
| AC073571.1 | CP        | AC073571.1 |
| MUC5B      | PSAP      | MUC5B      |
| RN7SL274P  | GRN       | RN7SL274P  |
| COL9A3     | SLC20A1   | COL9A3     |
| CROCC2     | MARCHF5   | CROCC2     |
| AC005696.4 | IGFBP3    | AC005696.4 |
| ABI3       | SON       | ABI3       |
| BACH2      | GOT1      | BACH2      |
| MAL        | SLC15A2   | MAL        |
| AC091132.5 | ACADM     | AC091132.5 |
| ZBP1       | SLC30A7   | ZBP1       |
| AL445665.1 | CCT5      | AL445665.1 |
| SSUH2      | SORT1     | SSUH2      |
| RGL4       | TMEM87B   | RGL4       |
| PPP1R1B    | VAV1      | PPP1R1B    |
| AP001207.3 | PLRG1     | AP001207.3 |
| NR1I3      | FBP1      | NR1I3      |
| POU2F2     | EIF2S3    | POU2F2     |
| LINC01134  | IARS2     | LINC01134  |
| AC138866.2 | TMBIM6    | AC138866.2 |
| AC079949.1 | MAOA      | AC079949.1 |
| AC138866.1 | HSPA5     | AC138866.1 |
| IFIT1      | B4GALT5   | IFIT1      |
| LINC02832  | COX6C     | LINC02832  |
| CRIP1      | CHL1      | CRIP1      |
| RBM34      | MFSD1     | RBM34      |
| MIR99AHG   | LINC01578 | MIR99AHG   |
| IRF8       | BUB3      | IRF8       |
| IL15RA     | TRA2A     | IL15RA     |
| DYSF       | ATP5PB    | DYSF       |
| AC114498.1 | POLR2B    | AC114498.1 |
| LINGO4     | ACSL3     | LINGO4     |
| AC011466.4 | SRSF3     | AC011466.4 |
| AC015967.2 | DHX29     | AC015967.2 |
| STAC2      | RAB1A     | STAC2      |
| TGM3       | SCNN1A    | TGM3       |
| BCL2L14    | WASHC2C   | BCL2L14    |
| C10orf82   | IMPAD1    | C10orf82   |
| AP001020.2 | GALNT12   | AP001020.2 |
| CDYL2      | LAMP2     | CDYL2      |
| AC099489.1 | ATXN10    | AC099489.1 |
| FRMD6-AS1  | SPTLC1    | FRMD6-AS1  |
| OASL       | FDX1      | OASL       |
| LETM2      | TM4SF1    | LETM2      |
| MX2        | TMEM50B   | MX2        |
| AL691477.1 | ATP5F1A   | AL691477.1 |
| AL162258.2 | RBM6      | AL162258.2 |
| PLEKHD1    | B2M       | PLEKHD1    |
| VASH2      | NPC2      | VASH2      |
| HERC5      | PERP      | HERC5      |
| AC004815.1 | ELOC      | AC004815.1 |
| RNF139-AS1 | ANXA3     | RNF139-AS1 |
| ZFH2       | SLBP      | ZFH2       |
| CMPK2      | TMED10    | CMPK2      |

Table S5

|            |           |            |
|------------|-----------|------------|
| RUSC2      | CPA4      | RUSC2      |
| CPED1      | EFTUD2    | CPED1      |
| ZBTB8A     | LDHB      | ZBTB8A     |
| ODF3B      | MMUT      | ODF3B      |
| IFITM1     | EEF1A1P6  | IFITM1     |
| ECM1       | SRI       | ECM1       |
| CD53       | LINC00511 | CD53       |
| IFIT3      | SSB       | IFIT3      |
| AC016590.1 | SKP1      | AC016590.1 |
| FCER1G     | AKIRIN1   | FCER1G     |
| HTN1       | DERL1     | HTN1       |
| GUSBP3     | ATRX      | GUSBP3     |
| ZNF324B    | UNC5B     | ZNF324B    |
| AEN        | TMEM30B   | AEN        |
| NHLRC4     | SLC44A1   | NHLRC4     |
| CHDC2      | LTA4H     | CHDC2      |
| FABP6      | SEPHS2    | FABP6      |
| H2AC20     | ACTG1     | H2AC20     |
| ZNF250     | IRF2BPL   | ZNF250     |
| PTGER2     | AQP5      | PTGER2     |
| IFITM3     | NDUFS8    | IFITM3     |
| PLEKHM3    | STT3B     | PLEKHM3    |
| SMAD9      | A4GALT    | SMAD9      |
| SPRR2A     | TUBA1A    | SPRR2A     |
| TBX6       | COPS8     | TBX6       |
| ZC3H3      | NDUFA10   | ZC3H3      |
| CD37       | PRXL2A    | CD37       |
| IFI44L     | GDE1      | IFI44L     |
| CROCC      | DARS1     | CROCC      |
| AL031282.2 | ANXA1     | AL031282.2 |
| PIK3AP1    | NUCB2     | PIK3AP1    |
| SLC2A5     | ID1       | SLC2A5     |
| ISG15      | FMO2      | ISG15      |
| ZNF579     | COG2      | ZNF579     |
| RSAD2      | PSMC5     | RSAD2      |
| SYT12      | RSRP1     | SYT12      |
| AC127164.1 | NDFIP1    | AC127164.1 |
| AKNA       | B4GALT1   | AKNA       |
| AC025580.3 | RPL6P27   | AC025580.3 |
| WDR49      | KIFAP3    | WDR49      |
| XRRA1      | F3        | XRRA1      |
| AC027243.1 | KARS1     | AC027243.1 |
| GUSBP2     | OSTC      | GUSBP2     |
| ING1       | IDH1      | ING1       |
| H4C14      | JAG1      | H4C14      |
| AC020741.1 | GLT8D1    | AC020741.1 |
| RAMP2-AS1  | KYNU      | RAMP2-AS1  |
| C1orf229   | CMTM6     | C1orf229   |
| H4C15      | SDR16C5   | H4C15      |
| NUPR1      | EMB       | NUPR1      |
| AC009646.2 | CCDC47    | AC009646.2 |
| BCDIN3D    | PROM1     | BCDIN3D    |
| ISG20      | APP       | ISG20      |
| MT2A       | MIPEP     | MT2A       |
| CFAP46     | C2CD2     | CFAP46     |
| MUC5AC     | TMEM33    | MUC5AC     |
| AC111149.2 | CD164     | AC111149.2 |
| CHP2       | MDH1      | CHP2       |
| SPTB       | TFCP2     | SPTB       |
| CCL5       | TMPRSS11D | CCL5       |
| DLEC1      | NR2F2     | DLEC1      |

Table S5

|               |            |                  |
|---------------|------------|------------------|
| RNF222        | VPS26A     | RNF222           |
| LBHD1         | CAST       | LBHD1            |
| NLRC3         | GSTK1      | NLRC3            |
| IL1RN         | YWHAB      | IL1RN            |
| P2RX7         | TXNDC17    | P2RX7            |
| EPHA10        | CCN2       | EPHA10           |
| PNRC1         | CKMT1A     | PNRC1            |
| PLPPR2        | PSMD11     | PLPPR2           |
| FER1L5        | PKM        | FER1L5           |
| MAPK12        | METTL21A   | MAPK12           |
| RP11-706O15.5 | LAPTM4B    | RP11-706O15.5    |
| AL592211.1    | PMPCB      | AL592211.1       |
| PML           | PRNP       | PML              |
| PLAAT2        | SEC63      | PLAAT2           |
| AC138932.1    | TMEM165    | AC138932.1       |
| CA5A          | CAV2       | CA5A             |
| USP18         | PYGL       | USP18            |
| SPI1          | ARPC5      | SPI1             |
| HNRNPA1P40    | TMEM150C   | HNRNPA1P40       |
| SPRR2E        | CD63       | SPRR2E           |
| MCF2L         | PLS3       | MCF2L            |
| FGR           | HLF        | FGR              |
| PPP1R16B      | AC087473.1 | PPP1R16B         |
| CCDC33        | ATP6V0D1   | CCDC33           |
| ENKD1         | PSMB3      | ENKD1            |
| MARCKSL1      | NOMO1      | MARCKSL1         |
| AC026523.2    | GTF2E2     | AC026523.2       |
| CFAP74        | OAT        | CFAP74           |
| HMOX1         | CD151      | HMOX1            |
| GPR65         | ALDH2      | GPR65            |
| NINL          | FBXO3      | NINL             |
| AP001107.1    | MORN2      | AP001107.1       |
| MICB          | CTBS       | MICB             |
| OAS2          | STOM       | OAS2             |
| UBE2T         | RNF149     | UBE2T            |
| MAP4K2        | MAP3K5     | MAP4K2           |
| RPL37         | ERLIN1     | RPL37            |
| IRF7          | ERMP1      | IRF7             |
| NTAN1         | SMIM15     | NTAN1            |
| IFI27         | CCDC80     | IFI27            |
| DTX2P1        | HSP90B1    | DTX2P1           |
| AC027290.3    | CKMT1B     | AC027290.3       |
| ABHD8         | TSPAN3     | ABHD8            |
| UBE2L6        | STAM2      | UBE2L6           |
| AC019117.3    | ABHD5      | AC019117.3       |
| TEKT2         | MSMO1      | TEKT2            |
| AC118344.4    | RBM5       | AC118344.4       |
| NATD1         | TM9SF3     | NATD1            |
| BEX2          | ATP1B1     | BEX2             |
| GNL3L         | SARAF      | GNL3L            |
| SRCIN1        | AMFR       | SRCIN1           |
| SAMD9         | DYNC2LI1   | SAMD9            |
| LINC01551     | H3-3A      | LINC01551        |
| SGTB          | RNF145     | SGTB             |
| TNFRSF14-AS1  | ERG28      | TNFRSF14-AS1     |
| SERPING1      | TUBA1C     | SERPING1         |
| BICD2         | RBM3       | BICD2            |
| SRGAP3-AS2    | GLB1       | SRGAP3-AS2       |
| DUSP5         | PGD        | DUSP5            |
| PRR29         | USP47      | PRR29            |
| AC008079.1    | TAGLN2     | AC008079.1Page 6 |

Table S5

|               |         |                  |
|---------------|---------|------------------|
| CD96          | RETREG2 | CD96             |
| RP11-706O15.3 | TMX4    | RP11-706O15.3    |
| RN7SL718P     | EXOC1   | RN7SL718P        |
| AHNAK2        | MAT2B   | AHNAK2           |
| NIN           | VPS25   | NIN              |
| OCEL1         | NUP107  | OCEL1            |
| CYP2F1        | ADAM15  | CYP2F1           |
| CCND3         | ARPC3   | CCND3            |
| RPS15         | SYPL1   | RPS15            |
| MUC13         | TGFBR1  | MUC13            |
| AKAP12        | DSG2    | AKAP12           |
| GUSBP1        | RPL4P4  | GUSBP1           |
| SPINK5        | SELENOP | SPINK5           |
| ZNF76         | EPCAM   | ZNF76            |
| PTCHD4        | S100A6  | PTCHD4           |
| CRYBG3        | COG6    | CRYBG3           |
| ZFP36         | ANKRD10 | ZFP36            |
| CARD16        | WDR33   | CARD16           |
| DHX35         | LRRC8D  | DHX35            |
| SAMD9L        | MMP14   | SAMD9L           |
| ST3GAL2       | RWDD4   | ST3GAL2          |
| PPDPF         | SDF4    | PPDPF            |
| EYA1          | DLD     | EYA1             |
| SP2           | FHL2    | SP2              |
| CCDC40        | SLC35F5 | CCDC40           |
| IFIH1         | TACSTD2 | IFIH1            |
| AMOTL2        | ASAH1   | AMOTL2           |
| NUMA1         | GUF1    | NUMA1            |
| FAM222A       | ENO1    | FAM222A          |
| CCDC88C       | LUC7L3  | CCDC88C          |
| RND1          | MTDH    | RND1             |
| UBA52         | JKAMP   | UBA52            |
| ARHGAP39      | H2AZ2   | ARHGAP39         |
| WDR62         | ERAP1   | WDR62            |
| AC134407.2    | TMEM192 | AC134407.2       |
| SCGB1A1       | RCN1    | SCGB1A1          |
| ATF3          | WASH6P  | ATF3             |
| ZNF500        | ITGB5   | ZNF500           |
| ALPK3         | SLC35A2 | ALPK3            |
| RP11-589F5.3  | TTC19   | RP11-589F5.3     |
| TICAM1        | OCIAD1  | TICAM1           |
| UBAP2         | ADAM28  | UBAP2            |
| CEP135        | P4HB    | CEP135           |
| ZNF329        | SFN     | ZNF329           |
| CCDC78        | SLC39A7 | CCDC78           |
| C12orf50      | EIF4A3  | C12orf50         |
| EVI2B         | TMEM30A | EVI2B            |
| YY1AP1        | GPD2    | YY1AP1           |
| TRIM14        | CD59    | TRIM14           |
| NKX3-1        | GTF2H2B | NKX3-1           |
| CCDC159       | PON2    | CCDC159          |
| JPX           | HACD3   | JPX              |
| ZNF335        | GSS     | ZNF335           |
| MRTFA         | TUFM    | MRTFA            |
| FOXG1         | ATP2C1  | FOXG1            |
| CCDC106       | CACHD1  | CCDC106          |
| SYTL5         | CA12    | SYTL5            |
| COTL1         | MBOAT2  | COTL1            |
| OAS1          | THYN1   | OAS1             |
| H2AC6         | PDIA6   | H2AC6            |
| AC004151.1    | LEMD3   | AC004151.1Page 7 |



Table S5

|            |            |            |
|------------|------------|------------|
| MUC21      | RPN1       | MUC21      |
| HOOK1      | PTTG1IP    | HOOK1      |
| H2BC18     | PRDX1      | H2BC18     |
| OAS3       | GAA        | OAS3       |
| PREX1      | ABCC3      | PREX1      |
| CCDC88B    | IER3IP1    | CCDC88B    |
| FTL        | EGFR       | FTL        |
| FOSB       | ANXA4      | FOSB       |
| WNK2       | IGFBP2     | WNK2       |
| MAST3      | SLC27A2    | MAST3      |
| EPSTI1     | TRAPPC3    | EPSTI1     |
| PCNT       | OS9        | PCNT       |
| NFATC3     | SLC18B1    | NFATC3     |
| HIGD2A     | ALOX15     | HIGD2A     |
| KIAA0040   | GNS        | KIAA0040   |
| C15orf62   | RRN3       | C15orf62   |
| CEP112     | PIGX       | CEP112     |
| ARHGAP26   | ARL6IP1    | ARHGAP26   |
| SGSM1      | RPL7AP66   | SGSM1      |
| MVB12B     | AC004069.1 | MVB12B     |
| SPAG9      | LGR4       | SPAG9      |
| SYNPO      | LRG1       | SYNPO      |
| PKD1P5     | SPARCL1    | PKD1P5     |
| SHANK2     | TMEM87A    | SHANK2     |
| CLEC16A    | ALDH1A1    | CLEC16A    |
| ELF4       | LMAN2      | ELF4       |
| NCCRP1     | AC007318.1 | NCCRP1     |
| H2AC18     | DDOST      | H2AC18     |
| HELB       | CHPF       | HELB       |
| FCGR2A     | CTSB       | FCGR2A     |
| ATP5F1E    | RASA1      | ATP5F1E    |
| SIPA1L3    | SLC2A1     | SIPA1L3    |
| H2AC19     | CFH        | H2AC19     |
| SEC24A     | TM9SF2     | SEC24A     |
| POLR2M     | EML3       | POLR2M     |
| GNG5       | CTSH       | GNG5       |
| KAT2B      | HNRNPA1P4  | KAT2B      |
| A2ML1      | ERLIN2     | A2ML1      |
| TNFAIP3    | MTRNR2L9   | TNFAIP3    |
| HSF1       | LRP5       | HSF1       |
| MFN1       | SEMA3A     | MFN1       |
| AC126755.1 | GFM2       | AC126755.1 |
| ALMS1      | HNRNPA1L2  | ALMS1      |
| FBXO48     | PIGG       | FBXO48     |
| RABIF      | RRM1       | RABIF      |
| SLC25A23   | TSPAN13    | SLC25A23   |
| MCUB       | TMEM68     | MCUB       |
| SOBP       | KRT5       | SOBP       |
| HELZ2      | ACVR1      | HELZ2      |
| CBX6       | ATP1A1     | CBX6       |
| SRCAP      | PRODH      | SRCAP      |
| TACC2      | RPAP2      | TACC2      |
| FAM193A    | MFSD11     | FAM193A    |
| SERPINB8   | FDFT1      | SERPINB8   |
| PRPF3      | MFSD14C    | PRPF3      |
| SYTL2      | ANKRD36    | SYTL2      |
| MBNL1      | SGK1       | MBNL1      |
| PATL1      | NEU1       | PATL1      |
| ZMIZ2      | CLDN4      | ZMIZ2      |
| ZNF358     | SCGB2A1    | ZNF358     |
| BLZF1      | ERLEC1     | BLZF1      |



Table S5

|           |            |           |
|-----------|------------|-----------|
| STK10     | EEF1A1P5   | STK10     |
| NIBAN1    | AL391121.1 | NIBAN1    |
| CDK18     | POR        | CDK18     |
| PHC3      | RAB3IP     | PHC3      |
| FYCO1     | FAM3B      | FYCO1     |
| LGALS9B   | CALR       | LGALS9B   |
| TEX9      | AC073333.1 | TEX9      |
| MX1       | EBPL       | MX1       |
| FNDC3B    | NPTN       | FNDC3B    |
| CLPB      | HSD17B13   | CLPB      |
| PRRC2A    | RPS21      | PRRC2A    |
| APOL3     | NIFK       | APOL3     |
| CENPBD1P1 | ALS2CL     | CENPBD1P1 |
| RAB8A     | PSEN2      | RAB8A     |
| DAP       | RCN2       | DAP       |
| ZNF592    | CHKA       | ZNF592    |
| GTDC1     | GTF2H2C    | GTDC1     |
| MOB3A     | TMA7       | MOB3A     |
| TADA2B    | ALDH7A1    | TADA2B    |
| SH3KBP1   | CD81       | SH3KBP1   |
| SAMD4B    | RTN4       | SAMD4B    |
| TRAF3IP2  | DHX36      | TRAF3IP2  |
| SPDEF     | SNRPA1     | SPDEF     |
| CDKN2B    | DNAJC1     | CDKN2B    |
| RBMS2     | HNRNPA1P35 | RBMS2     |
| CIZ1      | FTH1P10    | CIZ1      |
| DUSP3     | HNRNPAB    | DUSP3     |
| RFX5      | FUCA2      | RFX5      |
| MAP3K11   | ADK        | MAP3K11   |
| TENT5C    | FMO5       | TENT5C    |
| TBC1D15   | RTN3       | TBC1D15   |
| RPL36AL   | ASCC3      | RPL36AL   |
| R3HDM2    | PSME1      | R3HDM2    |
| MLPH      | WASH4P     | MLPH      |
| S100A11   | TFB2M      | S100A11   |
| RND3      | REEP5      | RND3      |
| UBB       | TMEM51     | UBB       |
| PAK4      | WSB1       | PAK4      |
| RASSF9    | SREK1      | RASSF9    |
| ATXN7     | RTN3P1     | ATXN7     |
| RUNDC1    | RARS1      | RUNDC1    |
| IQCE      | HADH       | IQCE      |
| R3HDM1    | MBOAT1     | R3HDM1    |
| NEK6      | PGAP4      | NEK6      |
| JADE2     | FAAH2      | JADE2     |
| TCOF1     | SMG1P4     | TCOF1     |
| CSNK1G2   | AC008810.1 | CSNK1G2   |
| TOB2      | TLR2       | TOB2      |
| ATN1      | ZMPSTE24   | ATN1      |
| NCOR2     | HNRNPA1P10 | NCOR2     |
| IL1R1     | PAPSS2     | IL1R1     |
| SPECC1    | AGL        | SPECC1    |
| ANKRD17   | TMEM9      | ANKRD17   |
| BICDL1    | TMEM9B     | BICDL1    |
| RAB3B     | TSPAN1     | RAB3B     |
| VPS37B    | CLN5       | VPS37B    |
| CRY2      | TMEM59     | CRY2      |
| ACSS1     | AL592114.1 | ACSS1     |
| WARS1     | GUSB       | WARS1     |
| OPTN      | ANAPC4     | OPTN      |
| ZNF609    | COMMD7     | ZNF609    |

Table S5

|          |            |           |
|----------|------------|-----------|
| PDE4DIP  | MAP3K6     | PDE4DIP   |
| FCHSD2   | ANKRD66    | FCHSD2    |
| SP3      | DSE        | SP3       |
| WWC1     | GCLC       | WWC1      |
| MLXIP    | PRSS8      | MLXIP     |
| ZFP36L2  | CYP4F12    | ZFP36L2   |
| SORBS3   | ABCE1      | SORBS3    |
| SND1     | ENPP4      | SND1      |
| FOXK1    | ABCA5      | FOXK1     |
| GTPBP1   | GLUD2      | GTPBP1    |
| CCDC69   | CALM2P2    | CCDC69    |
| C6orf132 | KLHL42     | C6orf132  |
|          | PRMT7      | LINC00963 |
|          | ITGB6      | ADGRG1    |
|          | SESN1      | SRSF5     |
|          | FTH1P2     | ACTN4     |
|          | CAMK2G     | EWSR1     |
|          | STAM       | HK1       |
|          | MANF       | TMED2     |
|          | THOC3      | CCZ1B     |
|          | MSTO1      | PSMD2     |
|          | ZPR1       | VAMP3     |
|          | INPP1      | CTNND1    |
|          | NOMO2      | ARRDC3    |
|          | LRRN1      | RDH10     |
|          | SRSF11     | EIF3CL    |
|          | SELENOI    | PRKAR1A   |
|          | TOPORS     | PPP2CB    |
|          | PLTP       | TSPYL1    |
|          | SLC39A6    | SRP9      |
|          | TMEM106C   | SMARCA2   |
|          | CD47       | GLUL      |
|          | SORD2P     | RBM25     |
|          | AL158206.1 | TNFRSF21  |
|          | KRT10      | SELENBP1  |
|          | EIF4A1P4   | DHCR24    |
|          | UNC93B3    | MAT2A     |
|          | CXADR      | EIF3C     |
|          | CUEDC1     | SCARB2    |
|          | IL10RB     | TMPRSS4   |
|          | YWHAZP4    | EIF4G1    |
|          | ATP5F1B    | ENC1      |
|          | PRKAR2B    | HNRNPH1   |
|          | SMC4       | WDR1      |
|          | PTDSS1     | ADSS2     |
|          | COPG2      | TMEM123   |
|          | GTF2F2     | IL33      |
|          | LONRF1     | CCZ1      |
|          | RPL10P9    | FBXL5     |
|          | HLA-B      | ZBTB7A    |
|          | RFNG       | HNRNPK    |
|          | MAN1B1     | PLEKHB2   |
|          | EIF4HP1    | HNRNPU    |
|          | H3P36      | ARL8B     |
|          | LACTB      | DHX15     |
|          | CNIH1      | UBQLN1    |
|          | MAPKAPK3   | ANXA7     |
|          | JPT1       | NDRG2     |
|          | SMAP1      | TOMM20    |
|          | CYP3A5     | GANAB     |
|          | SPTSSA     | CTBP2     |

Table S5

|  |            |         |
|--|------------|---------|
|  | TTC29      | CBWD6   |
|  | C1D        | ITGB1   |
|  | PA2G4P6    | ASPH    |
|  | DPAGT1     | ATP8B1  |
|  | SMARCAD1   | PFN2    |
|  | RPL7AP6    | DDB1    |
|  | BX679664.3 | ARGLU1  |
|  | PLS1       | SF3B1   |
|  | F11R       | ANPEP   |
|  | RMDN3      | DDX1    |
|  | DDAH2      | NCSTN   |
|  | BCAP29     | DNAJC10 |
|  | FSCN1      | DDX5    |
|  | AKAP1      | IFT57   |
|  | ITFG1      | PGK1    |
|  | ARVCF      | MIA3    |
|  | LOXL4      | SDC4    |
|  | AC090498.1 | VPS35   |
|  | FAM3D      | GALNT7  |
|  | HNRNPA1P7  | NAP1L4  |
|  | HNRNPA1P12 | SRSF10  |
|  | RHBDL2     | COPB1   |
|  | MPP7       | DDX17   |
|  | UBE2E3     | RBM39   |
|  | SCPEP1     | TAX1BP1 |
|  | DNAJB11    | ANKRD12 |
|  | SDHA       | LMBRD1  |
|  | LAMB3      | CALM2   |
|  | VAR51      | SLC37A3 |
|  | NT5DC1     | RDX     |
|  | PBXIP1     | ABCD3   |
|  | TAP2       | CKAP4   |
|  | HLA-F      | TMEM41B |
|  | CDH1       | NFE2L1  |
|  | PRELID1    | EPRS1   |
|  | UPK1B      | UBE2Q1  |
|  | PSMD1      | ERBB3   |
|  | TMTC4      | DIMT1   |
|  | ITGAV      | RAC1    |
|  | NUDT12     | CALM1   |
|  | PGAM4      | PRSS23  |
|  | RNF26      | SFPQ    |
|  | CCDC65     | EXOC3   |
|  | FAR5B      | ADAM9   |
|  | PARP2      | XPO1    |
|  | VIPR1      | ACSL5   |
|  | ARL3       | CCT2    |
|  | ENY2       | KDEL1   |
|  | SDCBPP3    | PCMTD2  |
|  | BCAP31     | ACTR2   |
|  | B4GALT4    | ALDH3A2 |
|  | RAMAC      | RTF1    |
|  | C5orf15    | SH3YL1  |
|  | FTH1P8     | ATP6V1A |
|  | MAD2L1BP   | CBX3    |
|  | RAC1P2     | MAP2K2  |
|  | NAAA       | CLSTN1  |
|  | GLULP4     | ZDHHC13 |
|  | EXOSC8     | LAPTM4A |
|  | MT-TY      | ANXA2   |
|  | BLOC1S4    | SEPTIN2 |

Table S5

|  |            |           |
|--|------------|-----------|
|  | AC144530.1 | SLC6A6    |
|  | TMEM45B    | CLTC      |
|  | ABHD3      | STIM2     |
|  | HLA-L      | RCBTB1    |
|  | AC113935.1 | PSMD14    |
|  | PRPF39     | PCYOX1    |
|  | CTNNAL1    | SACM1L    |
|  | VPS35P1    | ST14      |
|  | HSP90AB2P  | ACVR1B    |
|  | UNC93B7    | SEC61A1   |
|  | CHPT1      | SYNGR2    |
|  | TNC        | IL13RA1   |
|  | DDX50      | CAPZA2    |
|  | MLYCD      | XPO7      |
|  | AQP3       | CANX      |
|  | LRRCC1     | GALNT1    |
|  | TPBG       | SDC1      |
|  | GJB3       | MFSD14B   |
|  | PABPC1P4   | DDX18     |
|  | SLC25A17   | CCNDBP1   |
|  | SLC44A3    | ADGRF1    |
|  | SLC26A4    | UBE2N     |
|  | PRDX4      | MDFIC     |
|  | GGH        | SSR1      |
|  | HNRNPA1P8  | CNOT8     |
|  | LSAMP      | SDCBP     |
|  | CDS2       | RAB5C     |
|  | FAT1       | ERP44     |
|  | ATP6AP2    | MPZL2     |
|  | MRAP2      | HMGXB3    |
|  | G6PC3      | RSRC2     |
|  | ERO1B      | KPNA1     |
|  | CLK1       | HSPA9     |
|  | SNX14      | AKR1C3    |
|  | PTGES3P3   | ALCAM     |
|  | CCT6A      | CTNNB1    |
|  | AC006511.4 | GAPDH     |
|  | KLF9       | GSN       |
|  | FKBP1C     | TFCP2L1   |
|  | PIPSL      | PDCD4     |
|  | FAM162A    | DYNLT1    |
|  | AC024293.1 | QSOX1     |
|  | TMEM147    | GOLGA1    |
|  | ALG1       | ESYT2     |
|  | CCDC59     | HSP90AA1  |
|  | DBP        | RBBP9     |
|  | TF         | AAGAB     |
|  | FKBP9      | CD46      |
|  | RPL14P1    | TAP1      |
|  | TMEM43     | HIGD1A    |
|  | ACAD10     | CLDN7     |
|  | BORCS5     | GM2A      |
|  | EMC7       | KIF21A    |
|  | ACTA1      | MARK3     |
|  | UNC93B6    | PAICS     |
|  | EDEM2      | NFKB1     |
|  | PTK7       | HNRNPA2B1 |
|  | ARSDP1     | EIF5B     |
|  | TMED7      | WEE1      |
|  | TUSC3      | CDC42SE2  |
|  | PGRMC1     | USP48     |

Table S5

|  |            |                 |
|--|------------|-----------------|
|  | UBLCP1     | ANKRD36B        |
|  | AC026271.1 | HNRNPL          |
|  | BMI1       | RCAN3           |
|  | DYNC1I2P1  | ALDH3A1         |
|  | ARMT1      | SRPRA           |
|  | TLR1       | FMO3            |
|  | GPC1       | CLCN3           |
|  | VDAC1P1    | UGP2            |
|  | HNRNPKP4   | NIPAL2          |
|  | RRAGA      | NCKAP1          |
|  | KIT        | RAB5A           |
|  | ST13P3     | SLC38A2         |
|  | AC136632.1 | EIF1AX          |
|  | AL391244.2 | DECR1           |
|  | ETHE1      | SLC25A3         |
|  | TMED1      | SLC44A2         |
|  | RPL7P10    | CP              |
|  | HEXB       | PSAP            |
|  | MOSPD1     | GRN             |
|  | SLC52A2    | SLC20A1         |
|  | KDSR       | MARCHF5         |
|  | SELENOS    | IGFBP3          |
|  | HLA-A      | SON             |
|  | ADH1A      | GOT1            |
|  | RPL22P1    | SLC15A2         |
|  | DNAJB9     | ACADM           |
|  | AC083873.1 | SLC30A7         |
|  | DENND10P1  | CCT5            |
|  | FUCA1      | SORT1           |
|  | HSPA8P5    | TMEM87B         |
|  | LPCAT3     | VAV1            |
|  | SLC35B2    | PLRG1           |
|  | EXOSC9     | FBP1            |
|  | TAGLN2P1   | EIF2S3          |
|  | ATP5MC3    | IARS2           |
|  | EIF3FP3    | TMBIM6          |
|  | COL6A3     | MAOA            |
|  | CHCHD1     | HSPA5           |
|  | TMCO1      | B4GALT5         |
|  | PABPC3     | COX6C           |
|  | TP63       | CHL1            |
|  | CTSC       | MFSD1           |
|  | HSD17B12   | LINC01578       |
|  | CEACAM3    | BUB3            |
|  | SMG1P1     | TRA2A           |
|  | PSMC1P1    | ATP5PB          |
|  | ELMO3      | POLR2B          |
|  | AL158801.6 | ACSL3           |
|  | UQCRC1     | SRSF3           |
|  | HLA-V      | DHX29           |
|  | MGST1      | RAB1A           |
|  | NTS        | SCNN1A          |
|  | AL133477.1 | WASHC2C         |
|  | H3P44      | IMPAD1          |
|  | PSENN      | GALNT12         |
|  | RPL7AP34   | LAMP2           |
|  | PSPC1      | ATXN10          |
|  | LAMC1      | SPTLC1          |
|  | AL121769.1 | FDX1            |
|  | NDUFA12    | TM4SF1          |
|  | MT-TL1     | TMEM50B Page 13 |

Table S5

|  |            |           |
|--|------------|-----------|
|  | AC106795.1 | ATP5F1A   |
|  | AC022968.1 | RBM6      |
|  | LRRIQ1     | B2M       |
|  | LRRC17     | NPC2      |
|  | UFD1       | PERP      |
|  | UXS1       | ELOC      |
|  | AC008065.1 | ANXA3     |
|  | KRT6B      | SLBP      |
|  | HMG2P17    | TMED10    |
|  | ALOX15P1   | CPA4      |
|  | RPL37AP1   | EFTUD2    |
|  | ATP6AP1    | LDHB      |
|  | AC099670.1 | MMUT      |
|  | BMP3       | EEF1A1P6  |
|  | FKSG70     | SRI       |
|  | FAM171A1   | LINC00511 |
|  | RPN2       | SSB       |
|  | HLA-H      | SKP1      |
|  | EEF1A1P38  | AKIRIN1   |
|  | THNSL2     | DERL1     |
|  | PDIA3      | ATRX      |
|  | AC064799.1 | UNC5B     |
|  | KTN1       | TMEM30B   |
|  | AC209007.1 | SLC44A1   |
|  | AC104619.3 | LTA4H     |
|  | SYT8       | SEPHS2    |
|  | COQ5       | ACTG1     |
|  | MSH2       | IRF2BPL   |
|  | NPC1       | AQP5      |
|  | UQCRC1P1   | NDUFS8    |
|  | MORF4L1P1  | STT3B     |
|  | UBBP4      | A4GALT    |
|  | GPR89A     | TUBA1A    |
|  | MFSD5      | COPS8     |
|  | SERPINB4   | NDUFA10   |
|  | HNRNPA1P48 | PRXL2A    |
|  | AP000936.3 | GDE1      |
|  | SIRT3      | DARS1     |
|  | AC092115.2 | ANXA1     |
|  | RPS27P29   | NUCB2     |
|  | CYP26A1    | ID1       |
|  | ATP13A5    | FMO2      |
|  | AL109918.1 | COG2      |
|  | PIGO       | PSMC5     |
|  | ITM2B      | RSRP1     |
|  | RPL9P32    | NDFIP1    |
|  | PFN1P1     | B4GALT1   |
|  | EIF2S2P4   | RPL6P27   |
|  | HNRNPA3P6  | KIFAP3    |
|  | HSP90AB3P  | F3        |
|  | PLL1       | KARS1     |
|  | CLDN1      | OSTC      |
|  | ANXA8L1    | IDH1      |
|  | RPL23P8    | JAG1      |
|  | AC113404.3 | GLT8D1    |
|  | HSP90AA6P  | KYNU      |
|  | RPL7P47    | CMTM6     |
|  | SETP20     | SDR16C5   |
|  | PHF14      | EMB       |
|  | SRD5A3     | CCDC47    |
|  | SCAMP3     | PROM1     |

Table S5

|  |            |                  |
|--|------------|------------------|
|  | AC244034.1 | APP              |
|  | TRIAP1     | MIPEP            |
|  | F2RL1      | C2CD2            |
|  | PPIAP87    | TMEM33           |
|  | AP002784.2 | CD164            |
|  | SUMO2P1    | MDH1             |
|  | AC005000.1 | TFCP2            |
|  | HLA-C      | TMPRSS11D        |
|  | MTATP8P1   | NR2F2            |
|  | KRT18P16   | VPS26A           |
|  | SERBP1P5   | CAST             |
|  | RPL4P5     | GSTK1            |
|  | DCAF13     | YWHAB            |
|  | SRSF2      | TXNDC17          |
|  | SETSIP     | CCN2             |
|  | FKBP9P1    | CKMT1A           |
|  | PRCP       | PSMD11           |
|  | CD9        | PKM              |
|  | IFNGR1     | METTL21A         |
|  | RPL7P9     | LAPT4B           |
|  | TMEM212    | PMPCB            |
|  | EIF4BP3    | PRNP             |
|  | PSCA       | SEC63            |
|  | AL049597.1 | TMEM165          |
|  | RPL7P32    | CAV2             |
|  | YWHAZP5    | PYGL             |
|  | AC012085.1 | ARPC5            |
|  | HNRNPCP2   | TMEM150C         |
|  | FTLP3      | CD63             |
|  | APLP2      | PLS3             |
|  | SETP14     | HLF              |
|  | UBE2I      | AC087473.1       |
|  | CDC42P6    | ATP6V0D1         |
|  | ANXA8      | PSMB3            |
|  | AL354702.1 | NOMO1            |
|  | FGFR3      | GTF2E2           |
|  | H3-5       | OAT              |
|  | TSPAN6     | CD151            |
|  | EIF4A1P2   | ALDH2            |
|  | RPL7P1     | FBXO3            |
|  | GAPDHP65   | MORN2            |
|  | AC105250.1 | CTBS             |
|  | EPHA1      | STOM             |
|  | AC002075.2 | RNF149           |
|  | RPS7P10    | MAP3K5           |
|  | EEF1A1P19  | ERLIN1           |
|  | EIF5AL1    | ERMP1            |
|  | RPL10AP2   | SMIM15           |
|  | ARSD       | CCDC80           |
|  | XRCC6P2    | HSP90B1          |
|  | RPL13AP20  | CKMT1B           |
|  | AC092597.1 | TSPAN3           |
|  | EIF4BP6    | STAM2            |
|  | AC099560.2 | ABHD5            |
|  | RPL12P38   | MSMO1            |
|  | RPS26P6    | RBM5             |
|  | LDHBP2     | TM9SF3           |
|  | KRT18P11   | ATP1B1           |
|  | AC004057.1 | SARAF            |
|  | RPL34P26   | AMFR             |
|  | BZW1P2     | DYNC2LI1 Page 15 |



Table S5

|  |            |         |
|--|------------|---------|
|  | AC092683.1 | H3-3A   |
|  | S100A4     | RNF145  |
|  | HLA-DRB6   | ERG28   |
|  | C1GALT1C1  | TUBA1C  |
|  | RPS26P31   | RBM3    |
|  | SLC5A8     | GLB1    |
|  | MTCO1P40   | PGD     |
|  | GAPDHP44   | USP47   |
|  | RPL7AP11   | TAGLN2  |
|  | PPIC       | RETREG2 |
|  | TMX1       | TMX4    |
|  | ITGA6      | EXOC1   |
|  | GAPDHP61   | MAT2B   |
|  | PSMC1P5    | VPS25   |
|  | EIF4BP7    | NUP107  |
|  | PPIAP16    | ADAM15  |
|  | EEF1A1P7   | ARPC3   |
|  | RPSAP19    | SYPL1   |
|  | AC005480.2 | TGFBR1  |
|  | UNC50      | DSG2    |
|  | MIR22HG    | RPL4P4  |
|  | RPS26P8    | SELENOP |
|  | AC115223.1 | EPCAM   |
|  | HSPA8P1    | S100A6  |
|  | DPYD       | COG6    |
|  | AC126120.1 | ANKRD10 |
|  | AC016734.1 | WDR33   |
|  | RARRES1    | LRRC8D  |
|  | MTCO3P12   | MMP14   |
|  | DPY30      | RWDD4   |
|  | ALG5       | SDF4    |
|  | PPIAP66    | DLD     |
|  | PPIAP43    | FHL2    |
|  | AC112187.1 | SLC35F5 |
|  | PPIAL4C    | TACSTD2 |
|  | MTND4P12   | ASAH1   |
|  | TMEM183B   | GUF1    |
|  | ACTBP2     | ENO1    |
|  | HLA-G      | LUC7L3  |
|  | RPS7P11    | MTDH    |
|  | NACA3P     | JKAMP   |
|  | EEF1A1P29  | H2AZ2   |
|  | AC068522.1 | ERAP1   |
|  | RPS26P11   | TMEM192 |
|  | AC034236.1 | RCN1    |
|  | MTCO2P2    | WASH6P  |
|  | AC020898.1 | ITGB5   |
|  | CLCA4      | SLC35A2 |
|  | LYPD3      | TTC19   |
|  | EEF1A1P4   | OCIAD1  |
|  | AC004552.1 | ADAM28  |
|  | NAMPTP1    | P4HB    |
|  | PPIAP13    | SFN     |
|  | RPS4XP22   | SLC39A7 |
|  | EEF1A1P25  | EIF4A3  |
|  | TUBAP2     | TMEM30A |
|  | CROT       | GPD2    |
|  | AP000281.2 | CD59    |
|  | RPL10P12   | GTF2H2B |
|  | FTH1P15    | PON2    |
|  | RPL3P4     | HACD3   |

Table S5

|  |            |            |
|--|------------|------------|
|  | AC104339.1 | GSS        |
|  | RPS23P8    | TUFM       |
|  | PPIAP31    | ATP2C1     |
|  | AC135178.7 | CACHD1     |
|  | RPL10P4    | CA12       |
|  | AC104563.1 | MBOAT2     |
|  | RPS26P47   | THYN1      |
|  | H3P16      | PDIA6      |
|  | FTH1P11    | LEMD3      |
|  | EEF1A1P16  | RPN1       |
|  | YWHAZP3    | PTTG1IP    |
|  | GAPDHP73   | PRDX1      |
|  | GAPDHP63   | GAA        |
|  | AL627402.1 | ABCC3      |
|  | AC009245.1 | IER3IP1    |
|  | RPS3AP5    | EGFR       |
|  | H3P6       | ANXA4      |
|  | RPL27AP5   | IGFBP2     |
|  | RPS26P15   | SLC27A2    |
|  | H3P47      | TRAPPC3    |
|  | AC078819.1 | OS9        |
|  | TCN1       | SLC18B1    |
|  | HSP90AA2P  | ALOX15     |
|  | FTH1P7     | GNS        |
|  | RPS7P1     | RRN3       |
|  | RPS27AP16  | PIGX       |
|  | RPL7P19    | ARL6IP1    |
|  | TMSB4XP2   | RPL7AP66   |
|  | RPS26P28   | AC004069.1 |
|  | RPL10AP6   | LGR4       |
|  | PPIAP22    | LRG1       |
|  | EEF1A1P8   | SPARCL1    |
|  | ADH1B      | TMEM87A    |
|  | ATP1B3     | ALDH1A1    |
|  | PPIAP6     | LMAN2      |
|  | RPL3P2     | AC007318.1 |
|  | RPL13AP25  | DDOST      |
|  | MTND6P4    | CHPF       |
|  | RPS24P8    | CTSB       |
|  | AC092865.1 | RASA1      |
|  | RPL15P20   | SLC2A1     |
|  | AL133260.1 | CFH        |
|  | FTH1P16    | TM9SF2     |
|  | EEF1A1P11  | EML3       |
|  | RPS15AP1   | CTSH       |
|  | FTH1P3     | HNRNPA1P4  |
|  | APOD       | ERLIN2     |
|  | AL596275.1 | MTRNR2L9   |
|  | RPL15P18   | LRP5       |
|  | RPL17P22   | SEMA3A     |
|  | KRT6C      | GFM2       |
|  | EIF4A1P10  | HNRNPA1L2  |
|  | PDIA3P1    | PIGG       |
|  | FTH1P20    | RRM1       |
|  | EEF1A1P22  | TSPAN13    |
|  | ANXA2P2    | TMEM68     |
|  | AC073072.1 | KRT5       |
|  | AC025518.1 | ACVR1      |
|  | S100A2     | ATP1A1     |
|  | RPL7P23    | PRODH      |
|  | MTND6P3    | RPAP2      |

Table S5

|  |            |            |
|--|------------|------------|
|  | AL009174.1 | MFSD11     |
|  | AC092670.1 | FDFT1      |
|  | PPIAP29    | MFSD14C    |
|  | FTH1P12    | ANKRD36    |
|  | AC090543.3 | SGK1       |
|  | H3C9P      | NEU1       |
|  | RPL17P36   | CLDN4      |
|  | MTND5P11   | SCGB2A1    |
|  | MT-TE      | ERLEC1     |
|  | MTCO2P12   | EEF1A1P5   |
|  | MTRNR2L1   | AL391121.1 |
|  | HLA-J      | POR        |
|  | EEF1A1P12  | RAB3IP     |
|  | EEF1A1P14  | FAM3B      |
|  | AC091429.1 | CALR       |
|  | FTH1P5     | AC073333.1 |
|  | TPT1P9     | EBPL       |
|  | EEF1A1P13  | NPTN       |
|  | AC006386.2 | HSD17B13   |
|  | AC012005.1 | RPS21      |
|  | RPL41P2    | NIFK       |
|  | MT-TA      | ALS2CL     |
|  |            | PSEN2      |
|  |            | RCN2       |
|  |            | CHKA       |
|  |            | GTF2H2C    |
|  |            | TMA7       |
|  |            | ALDH7A1    |
|  |            | CD81       |
|  |            | RTN4       |
|  |            | DHX36      |
|  |            | SNRPA1     |
|  |            | DNAJC1     |
|  |            | HNRNPA1P35 |
|  |            | FTH1P10    |
|  |            | HNRNPAB    |
|  |            | FUCA2      |
|  |            | ADK        |
|  |            | FMO5       |
|  |            | RTN3       |
|  |            | ASCC3      |
|  |            | PSME1      |
|  |            | WASH4P     |
|  |            | TFB2M      |
|  |            | REEP5      |
|  |            | TMEM51     |
|  |            | WSB1       |
|  |            | SREK1      |
|  |            | RTN3P1     |
|  |            | RARS1      |
|  |            | HADH       |
|  |            | MBOAT1     |
|  |            | PGAP4      |
|  |            | FAAH2      |
|  |            | SMG1P4     |
|  |            | AC008810.1 |
|  |            | TLR2       |
|  |            | ZMPSTE24   |
|  |            | HNRNPA1P10 |
|  |            | PAPSS2     |
|  |            | AGL        |

Table S5

|  |            |
|--|------------|
|  | TMEM9      |
|  | TMEM9B     |
|  | TSPAN1     |
|  | CLN5       |
|  | TMEM59     |
|  | AL592114.1 |
|  | GUSB       |
|  | ANAPC4     |
|  | COMMD7     |
|  | MAP3K6     |
|  | ANKRD66    |
|  | DSE        |
|  | GCLC       |
|  | PRSS8      |
|  | CYP4F12    |
|  | ABCE1      |
|  | ENPP4      |
|  | ABCA5      |
|  | GLUD2      |
|  | CALM2P2    |
|  | KLHL42     |
|  | PRMT7      |
|  | ITGB6      |
|  | SESN1      |
|  | FTH1P2     |
|  | CAMK2G     |
|  | STAM       |
|  | MANF       |
|  | THOC3      |
|  | MSTO1      |
|  | ZPR1       |
|  | INPP1      |
|  | NOMO2      |
|  | LRRN1      |
|  | SRSF11     |
|  | SELENOI    |
|  | TOPORS     |
|  | PLTP       |
|  | SLC39A6    |
|  | TMEM106C   |
|  | CD47       |
|  | SORD2P     |
|  | AL158206.1 |
|  | KRT10      |
|  | EIF4A1P4   |
|  | UNC93B3    |
|  | CXADR      |
|  | CUEDC1     |
|  | IL10RB     |
|  | YWHAZP4    |
|  | ATP5F1B    |
|  | PRKAR2B    |
|  | SMC4       |
|  | PTDSS1     |
|  | COPG2      |
|  | GTF2F2     |
|  | LONRF1     |
|  | RPL10P9    |
|  | HLA-B      |
|  | RFNG       |
|  | MAN1B1     |

Table S5

|  |               |
|--|---------------|
|  | EIF4HP1       |
|  | H3P36         |
|  | LACTB         |
|  | CNIH1         |
|  | MAPKAPK3      |
|  | JPT1          |
|  | SMAP1         |
|  | CYP3A5        |
|  | SPTSSA        |
|  | TTC29         |
|  | C1D           |
|  | PA2G4P6       |
|  | DPAGT1        |
|  | SMARCAD1      |
|  | RPL7AP6       |
|  | BX679664.3    |
|  | PLS1          |
|  | F11R          |
|  | RMDN3         |
|  | DDAH2         |
|  | BCAP29        |
|  | FSCN1         |
|  | AKAP1         |
|  | ITFG1         |
|  | ARVCF         |
|  | LOXL4         |
|  | AC090498.1    |
|  | FAM3D         |
|  | HNRNPA1P7     |
|  | HNRNPA1P12    |
|  | RHBDL2        |
|  | MPP7          |
|  | UBE2E3        |
|  | SCPEP1        |
|  | DNAJB11       |
|  | SDHA          |
|  | LAMB3         |
|  | VARA1         |
|  | NT5DC1        |
|  | PBXIP1        |
|  | TAP2          |
|  | HLA-F         |
|  | CDH1          |
|  | PRELID1       |
|  | UPK1B         |
|  | PSMD1         |
|  | TMTC4         |
|  | ITGAV         |
|  | NUDT12        |
|  | PGAM4         |
|  | RNF26         |
|  | CCDC65        |
|  | FARSA         |
|  | PARP2         |
|  | VIPR1         |
|  | ARL3          |
|  | ENY2          |
|  | SDCBPP3       |
|  | BCAP31        |
|  | B4GALT4       |
|  | RAMAC Page 20 |

Table S5

|  |            |
|--|------------|
|  | C5orf15    |
|  | FTH1P8     |
|  | MAD2L1BP   |
|  | RAC1P2     |
|  | NAAA       |
|  | GLULP4     |
|  | EXOSC8     |
|  | MT-TY      |
|  | BLOC1S4    |
|  | AC144530.1 |
|  | TMEM45B    |
|  | ABHD3      |
|  | HLA-L      |
|  | AC113935.1 |
|  | PRPF39     |
|  | CTNNAL1    |
|  | VPS35P1    |
|  | HSP90AB2P  |
|  | UNC93B7    |
|  | CHPT1      |
|  | TNC        |
|  | DDX50      |
|  | MLYCD      |
|  | AQP3       |
|  | LRRCC1     |
|  | TPBG       |
|  | GJB3       |
|  | PABPC1P4   |
|  | SLC25A17   |
|  | SLC44A3    |
|  | SLC26A4    |
|  | PRDX4      |
|  | GGH        |
|  | HNRNPA1P8  |
|  | LSAMP      |
|  | CDS2       |
|  | FAT1       |
|  | ATP6AP2    |
|  | MRAP2      |
|  | G6PC3      |
|  | ERO1B      |
|  | CLK1       |
|  | SNX14      |
|  | PTGES3P3   |
|  | CCT6A      |
|  | AC006511.4 |
|  | KLF9       |
|  | FKBP1C     |
|  | PIPSL      |
|  | FAM162A    |
|  | AC024293.1 |
|  | TMEM147    |
|  | ALG1       |
|  | CCDC59     |
|  | DBP        |
|  | TF         |
|  | FKBP9      |
|  | RPL14P1    |
|  | TMEM43     |
|  | ACAD10     |
|  | BORCS5     |

Table S5

|  |            |
|--|------------|
|  | EMC7       |
|  | ACTA1      |
|  | UNC93B6    |
|  | EDEM2      |
|  | PTK7       |
|  | ARSDP1     |
|  | TMED7      |
|  | TUSC3      |
|  | PGRMC1     |
|  | UBLCP1     |
|  | AC026271.1 |
|  | BMI1       |
|  | DYNC1I2P1  |
|  | ARMT1      |
|  | TLR1       |
|  | GPC1       |
|  | VDAC1P1    |
|  | HNRNPKP4   |
|  | RRAGA      |
|  | KIT        |
|  | ST13P3     |
|  | AC136632.1 |
|  | AL391244.2 |
|  | ETHE1      |
|  | TMED1      |
|  | RPL7P10    |
|  | HEXB       |
|  | MOSPD1     |
|  | SLC52A2    |
|  | KDSR       |
|  | SELENOS    |
|  | HLA-A      |
|  | ADH1A      |
|  | RPL22P1    |
|  | DNAJB9     |
|  | AC083873.1 |
|  | DENND10P1  |
|  | FUCA1      |
|  | HSPA8P5    |
|  | LPCAT3     |
|  | SLC35B2    |
|  | EXOSC9     |
|  | TAGLN2P1   |
|  | ATP5MC3    |
|  | EIF3FP3    |
|  | COL6A3     |
|  | CHCHD1     |
|  | TMCO1      |
|  | PABPC3     |
|  | TP63       |
|  | CTSC       |
|  | HSD17B12   |
|  | CEACAM3    |
|  | SMG1P1     |
|  | PSMC1P1    |
|  | ELMO3      |
|  | AL158801.6 |
|  | UQCRC1     |
|  | HLA-V      |
|  | MGST1      |
|  | NTS        |



Table S5

|  |            |
|--|------------|
|  | AL133477.1 |
|  | H3P44      |
|  | PSENE1     |
|  | RPL7AP34   |
|  | PSPC1      |
|  | LAMC1      |
|  | AL121769.1 |
|  | NDUFA12    |
|  | MT-TL1     |
|  | AC106795.1 |
|  | AC022968.1 |
|  | LRRIQ1     |
|  | LRRC17     |
|  | UFD1       |
|  | UXS1       |
|  | AC008065.1 |
|  | KRT6B      |
|  | HMG2P17    |
|  | ALOX15P1   |
|  | RPL37AP1   |
|  | ATP6AP1    |
|  | AC099670.1 |
|  | BMP3       |
|  | FKSG70     |
|  | FAM171A1   |
|  | RPN2       |
|  | HLA-H      |
|  | EEF1A1P38  |
|  | THNSL2     |
|  | PDIA3      |
|  | AC064799.1 |
|  | KTN1       |
|  | AC209007.1 |
|  | AC104619.3 |
|  | SYT8       |
|  | COQ5       |
|  | MSH2       |
|  | NPC1       |
|  | UQCRC1P1   |
|  | MORF4L1P1  |
|  | UBBP4      |
|  | GPR89A     |
|  | MFSD5      |
|  | SERPIN4    |
|  | HNRNPA1P48 |
|  | AP000936.3 |
|  | SIRT3      |
|  | AC092115.2 |
|  | RPS27P29   |
|  | CYP26A1    |
|  | ATP13A5    |
|  | AL109918.1 |
|  | PIGO       |
|  | ITM2B      |
|  | RPL9P32    |
|  | PFN1P1     |
|  | EIF2S2P4   |
|  | HNRNPA3P6  |
|  | HSP90AB3P  |
|  | PLLP       |
|  | CLDN1      |

Table S5

|  |            |
|--|------------|
|  | ANXA8L1    |
|  | RPL23P8    |
|  | AC113404.3 |
|  | HSP90AA6P  |
|  | RPL7P47    |
|  | SETP20     |
|  | PHF14      |
|  | SRD5A3     |
|  | SCAMP3     |
|  | AC244034.1 |
|  | TRIAP1     |
|  | F2RL1      |
|  | PPIAP87    |
|  | AP002784.2 |
|  | SUMO2P1    |
|  | AC005000.1 |
|  | HLA-C      |
|  | MTATP8P1   |
|  | KRT18P16   |
|  | SERBP1P5   |
|  | RPL4P5     |
|  | DCAF13     |
|  | SRSF2      |
|  | SETSIP     |
|  | FKBP9P1    |
|  | PRCP       |
|  | CD9        |
|  | IFNGR1     |
|  | RPL7P9     |
|  | TMEM212    |
|  | EIF4BP3    |
|  | PSCA       |
|  | AL049597.1 |
|  | RPL7P32    |
|  | YWHAZP5    |
|  | AC012085.1 |
|  | HNRNPCP2   |
|  | FTLP3      |
|  | APLP2      |
|  | SETP14     |
|  | UBE2I      |
|  | CDC42P6    |
|  | ANXA8      |
|  | AL354702.1 |
|  | FGFR3      |
|  | H3-5       |
|  | TSPAN6     |
|  | EIF4A1P2   |
|  | RPL7P1     |
|  | GAPDHP65   |
|  | AC105250.1 |
|  | EPHA1      |
|  | AC002075.2 |
|  | RPS7P10    |
|  | EEF1A1P19  |
|  | EIF5AL1    |
|  | RPL10AP2   |
|  | ARSD       |
|  | XRCC6P2    |
|  | RPL13AP20  |
|  | AC092597.1 |

Table S5

|  |                 |
|--|-----------------|
|  | EIF4BP6         |
|  | AC099560.2      |
|  | RPL12P38        |
|  | RPS26P6         |
|  | LDHBP2          |
|  | KRT18P11        |
|  | AC004057.1      |
|  | RPL34P26        |
|  | BZW1P2          |
|  | AC092683.1      |
|  | S100A4          |
|  | HLA-DRB6        |
|  | C1GALT1C1       |
|  | RPS26P31        |
|  | SLC5A8          |
|  | MTCO1P40        |
|  | GAPDHP44        |
|  | RPL7AP11        |
|  | PPIC            |
|  | TMX1            |
|  | ITGA6           |
|  | GAPDHP61        |
|  | PSMC1P5         |
|  | EIF4BP7         |
|  | PPIAP16         |
|  | EEF1A1P7        |
|  | RPSAP19         |
|  | AC005480.2      |
|  | UNC50           |
|  | MIR22HG         |
|  | RPS26P8         |
|  | AC115223.1      |
|  | HSPA8P1         |
|  | DPYD            |
|  | AC126120.1      |
|  | AC016734.1      |
|  | RARRES1         |
|  | MTCO3P12        |
|  | DPY30           |
|  | ALG5            |
|  | PPIAP66         |
|  | PPIAP43         |
|  | AC112187.1      |
|  | PPIAL4C         |
|  | MTND4P12        |
|  | TMEM183B        |
|  | ACTBP2          |
|  | HLA-G           |
|  | RPS7P11         |
|  | NACA3P          |
|  | EEF1A1P29       |
|  | AC068522.1      |
|  | RPS26P11        |
|  | AC034236.1      |
|  | MTCO2P2         |
|  | AC020898.1      |
|  | CLCA4           |
|  | LYPD3           |
|  | EEF1A1P4        |
|  | AC004552.1      |
|  | NAMPTP1 Page 25 |

Table S5

|  |                   |
|--|-------------------|
|  | PPIAP13           |
|  | RPS4XP22          |
|  | EEF1A1P25         |
|  | TUBAP2            |
|  | CROT              |
|  | AP000281.2        |
|  | RPL10P12          |
|  | FTH1P15           |
|  | RPL3P4            |
|  | AC104339.1        |
|  | RPS23P8           |
|  | PPIAP31           |
|  | AC135178.7        |
|  | RPL10P4           |
|  | AC104563.1        |
|  | RPS26P47          |
|  | H3P16             |
|  | FTH1P11           |
|  | EEF1A1P16         |
|  | YWHAZP3           |
|  | GAPDHP73          |
|  | GAPDHP63          |
|  | AL627402.1        |
|  | AC009245.1        |
|  | RPS3AP5           |
|  | H3P6              |
|  | RPL27AP5          |
|  | RPS26P15          |
|  | H3P47             |
|  | AC078819.1        |
|  | TCN1              |
|  | HSP90AA2P         |
|  | FTH1P7            |
|  | RPS7P1            |
|  | RPS27AP16         |
|  | RPL7P19           |
|  | TMSB4XP2          |
|  | RPS26P28          |
|  | RPL10AP6          |
|  | PPIAP22           |
|  | EEF1A1P8          |
|  | ADH1B             |
|  | ATP1B3            |
|  | PPIAP6            |
|  | RPL3P2            |
|  | RPL13AP25         |
|  | MTND6P4           |
|  | RPS24P8           |
|  | AC092865.1        |
|  | RPL15P20          |
|  | AL133260.1        |
|  | FTH1P16           |
|  | EEF1A1P11         |
|  | RPS15AP1          |
|  | FTH1P3            |
|  | APOD              |
|  | AL596275.1        |
|  | RPL15P18          |
|  | RPL17P22          |
|  | KRT6C             |
|  | EIF4A1P10 Page 26 |

Table S5

|  |            |
|--|------------|
|  | PDIA3P1    |
|  | FTH1P20    |
|  | EEF1A1P22  |
|  | ANXA2P2    |
|  | AC073072.1 |
|  | AC025518.1 |
|  | S100A2     |
|  | RPL7P23    |
|  | MTND6P3    |
|  | AL009174.1 |
|  | AC092670.1 |
|  | PPIAP29    |
|  | FTH1P12    |
|  | AC090543.3 |
|  | H3C9P      |
|  | RPL17P36   |
|  | MTND5P11   |
|  | MT-TE      |
|  | MTCO2P12   |
|  | MTRNR2L1   |
|  | HLA-J      |
|  | EEF1A1P12  |
|  | EEF1A1P14  |
|  | AC091429.1 |
|  | FTH1P5     |
|  | TPT1P9     |
|  | EEF1A1P13  |
|  | AC006386.2 |
|  | AC012005.1 |
|  | RPL41P2    |
|  | MT-TA      |
