# Supplementary material for: Transcriptome of nasopharyngeal samples from COVID-19 patients and a comparative analysis with other SARS-CoV-2 infection models reveal disparate host responses against SARS-CoV-2
Source: Springer Nature journal article supplement (doi:10.1186/s12967-020-02695-0), 2021-01-07
Supplement: MOESM10 [file 18747950]

Table S8

**Additional file 10 : Differentially expressed genes in SARS-CoV-2 infected lungs compared to the our nasal samples used in this study.**

| Up-regulated in Lungs compared to Nasal samples (Bangladeshi) | Down-regulated in Lungs compared to Nasal samples (Bangladeshi) |
|---------------------------------------------------------------|-----------------------------------------------------------------|
| CLCA4                                                         | AC027290.3                                                      |
| S100A2                                                        | IL1RN                                                           |
| FGFBP1                                                        | RN7SKP255                                                       |
| AC091429.1                                                    | CD53                                                            |
| LYPD3                                                         | SPI1                                                            |
| RPL17P36                                                      | PNRC1                                                           |
| MTRNR2L1                                                      | IFI44L                                                          |
| FOLH1B                                                        | AC073571.1                                                      |
| RPL21P134                                                     | MX2                                                             |
| RPL41P2                                                       | FBXO48                                                          |
| EEF1A1P12                                                     | ZFP36                                                           |
| KRT6C                                                         | AL354919.1                                                      |
| TPT1P9                                                        | IFIT1                                                           |
| KRT8P48                                                       | AC016590.1                                                      |
| AC209007.1                                                    | H2BC4                                                           |
| AC090543.3                                                    | PTCHD4                                                          |
| AC004453.1                                                    | IFIT2                                                           |
| EEF1A1P14                                                     | DUSP5                                                           |
| UNC93B2                                                       | MUC5AC                                                          |
| SLC44A5                                                       | MUC5B                                                           |
| H3C9P                                                         | AEN                                                             |
| YWHAZP4                                                       | AC099489.1                                                      |
| BX248409.1                                                    | NR4A1                                                           |
| FTH1P5                                                        | SKAP2                                                           |
| MT-TA                                                         | AC006435.4                                                      |
| RPL10P4                                                       | CROCC2                                                          |
| AL133260.1                                                    | H2BC8                                                           |
| KRT8P5                                                        | EGR1                                                            |
| RPL31P63                                                      | HOPX                                                            |
| AC091685.2                                                    | EVI2A                                                           |
| PPIAP13                                                       | SCARNA7                                                         |
| EEF1A1P16                                                     | C3AR1                                                           |
| AC073072.1                                                    | AC092299.7                                                      |
| EEF1A1P22                                                     | RN7SKP80                                                        |
| LDHBP2                                                        | AC015967.2                                                      |
| EEF1A1P8                                                      | FP236383.8                                                      |
| FTH1P12                                                       | H4C8                                                            |
| PTMAP5                                                        | H2BC7                                                           |
| HSP90AA2P                                                     | MEG3                                                            |
| RPS2P7                                                        | MOCS1                                                           |
| KRT8P3                                                        | HTN3                                                            |
| RPS27AP16                                                     | RN7SKP203                                                       |
| PPIAP16                                                       | FP236383.7                                                      |
| RPL17P22                                                      | FAM27E3                                                         |
| RPS18P12                                                      | H2AC12                                                          |
| HSPA8P1                                                       | SNORA54                                                         |
| PDIA3P1                                                       | SLC38A5                                                         |

Table S8

|            |             |
|------------|-------------|
| RPL10P6    | H19         |
| AC104563.1 | SIGLEC14    |
| AC022210.1 | MT-RNR1     |
| GAPDHP63   | JSRP1       |
| MT-TE      | SNORA79B    |
| RPL7P23    | VSIG4       |
| FTH1P16    | RN7SL396P   |
| APOD       | RNU5B-1     |
| PPIAP6     | SSTR5-AS1   |
| RPL24P4    | IGKC        |
| GAPDHP1    | LINC01783   |
| SETP20     | AC011595.1  |
| AC104339.1 | RNU6ATAC    |
| KRT8P32    | COL5A1      |
| MFSD3      | RN7SL471P   |
| AC012005.1 | SNORD94     |
| BX679664.1 | HIST1H3B    |
| AC025518.1 | SNORA74D    |
| HLA-J      | CCL19       |
| RPL7P15    | SNORA71D    |
| EEF1A1P7   | H1-5        |
| RPL12P38   | SNORD17     |
| CROT       | FRZB        |
| RPS3AP5    | ADAMTS8     |
| AC068522.1 | RN7SKP71    |
| MTND6P3    | PLA2G5      |
| AL162430.2 | SNORA5A     |
| RPS26P15   | SLC5A2      |
| AC090686.1 | AC010768.1  |
| AC092670.1 | AL121758.1  |
| PA2G4P6    | RNA5SP481   |
| RPL10AP6   | LRRC8C-DT   |
| AC097658.2 | AC005515.1  |
| HNRNPA1P2  | IGF2        |
| RPL3P2     | RNA5-8SP6   |
| ANXA8      | AL161626.1  |
| HSPA8P5    | H2BC9       |
| AC006386.2 | SNORD89     |
| HNRNPKP4   | H3C11       |
| RPL13AP25  | RNA5SP74    |
| PPIAL4C    | PRH2        |
| RPS13P2    | H2AC4       |
| PPIAP43    | NDUFA4L2    |
| AL049873.1 | COL5A3      |
| HSP90AA6P  | AC024267.4  |
| ANXA8L1    | SNORA49     |
| SUMO2P1    | RN7SL778P   |
| TPT1P5     | RN7SL151P   |
| RPL7P19    | C19orf38    |
| PPIAP29    | H1-3        |
| AC005000.1 | AC024051.8  |
| RPS7P14    | AC024051.10 |
| RPL12P8    | AC024051.3  |
| RPS27P29   | AC024051.7  |
| RPS3AP25   | SNORA74A    |
| AP002784.2 | RNA5SP162   |
| MTND5P11   | H4C4        |

Table S8

|            |              |
|------------|--------------|
| AL627402.1 | AC024051.1   |
| AL121871.1 | AL162581.1   |
| TAPT1-AS1  | RNU2-1       |
| RPS2P4     | AC105036.3   |
| RPS26P39   | KIAA1614-AS1 |
| MT-TL1     | RP11-180P8.3 |
| RPSAP19    | PTGDS        |
| AC078819.1 | H4C3         |
| RPS3AP47   | AC027281.2   |
| FTH1P3     | ARHGAP26-AS1 |
| RPL15P18   | H1-4         |
| RPS20P14   | H4C6         |
| AL009174.1 | SCARNA5      |
| RPL23AP65  | KCNK12       |
| AC083873.1 | AC026369.2   |
| ACTA1      | SNORA80A     |
| Z97353.1   | ADGRL3       |
| KRT8P45    | CTC-251116.1 |
| RPL4P3     | FAM27B       |
| RPL15P20   | RNA5SP225    |
| EEF1A1P29  | RPA4         |
| AC092865.1 | RNA5SP149    |
| EIF4A1P10  | AC087521.3   |
| AC100757.1 | HMGCLL1      |
| FTH1P20    | RNU1-67P     |
| TMX1       | NCAM2        |
| IMP3       | PAPPA        |
| AC104619.3 | KL           |
| ST13P3     | RNA5SP141    |
| AC104257.1 | FP236383.5   |
| AC136632.1 | RNU4ATAC     |
| AC020898.1 | MIR5188      |
| AL139095.2 | MAGI1-AS1    |
| EPHA1      | RNA5SP506    |
| HLA-G      | FZD10        |
| TMSB4XP2   | HES5         |
| AC113404.3 | AC027514.1   |
| HSP90AB3P  | MIR23A       |
| EEF1A1P38  | AC024051.9   |
| COX6A1P2   | H4C12        |
| DTYMK      | RNA5SP429    |
| ALG5       | RNA28S5      |
| AL162151.2 | B4GALNT1     |
| GAPDHP61   | AFF2         |
| RPL7AP11   | H2BC14       |
| DPYD       | RNA5SP145    |
| KRT8P33    | AC005476.2   |
| YWHAZP3    | AL157895.2   |
| SCAMP3     | AC006449.2   |
| RPS26P28   | MIR3648-2    |
| AC073861.1 | AC025423.1   |
| RPL23P8    | AL355388.1   |
| MORF4L1P1  | SNORD15B     |
| NACA3P     | ALX4         |
| DENND10P1  | CCDC33       |
| PTN        | REXO1L2P     |
| AC010468.1 | RAG2         |

Table S8

|            |             |
|------------|-------------|
| UQCRFS1P1  | AC092612.1  |
| RPSAP61    | PCA3        |
| ALKBH3     | RNVU1-27    |
| RPS26P3    | DIRC3       |
| AC244034.1 | H4C11       |
| CRYZ       | ROBO3       |
| AL355802.1 | MIR3648-1   |
| FTH1P11    | RN7SL752P   |
| PTGES3P3   | RN7SL801P   |
| RPSAP5     | RN7SL4P     |
| YWHAZP5    | FP236383.10 |
| AC112187.1 | AL109920.1  |
| AL158206.1 | RN7SL5P     |
| CDC42P6    | RNA5SP226   |
| RPL21P93   | FP236383.12 |
| RBM8B      | FP236383.4  |
| XRCC6P2    | FP671120.7  |
| GAPDHP65   | PDZD4       |
| DBP        | IDSP1       |
| TPI1P1     | AC010768.2  |
| EZH2       | OLFM5P      |
| COQ5       | SNORA53     |
| AC092597.1 | PRB1        |
| CHCHD1     | RNU5A-1     |
| PRCP       | H4C5        |
| PGDP1      | ERICH6B     |
| FOLR1      | TMIGD3      |
| TOP2A      | AC090970.1  |
| PIGO       | SNORA74B    |
| RPL7AP31   | RNA5SP161   |
| SIL1       | RNY4P6      |
| AC000089.1 | OR10A3      |
| TAGLN2P1   | LY86-AS1    |
| C1GALT1C1  | AC074135.1  |
| RPL10P12   | PRB2        |
| PFN1P1     | SCAT2       |
| RTN3P1     | AL135938.1  |
| PARP2      | RNA5-8SN1   |
| AC107032.1 | FP671120.4  |
| CHST12     | RNA5-8SN2   |
| HMG2P46    | RNA5-8SN3   |
| GPR89A     | PRB4        |
| GLULP4     | LINC00901   |
| HLA-DRB6   | AL031716.1  |
| TMEM179B   | AL160408.1  |
| AC026271.1 | RNU4-1      |
| TMSB4XP4   | AC079601.1  |
| EIF4BP7    | RNY3        |
| ABHD3      | HCN2        |
| RPS23P8    | BAIAP2L2    |
| EIF4HP1    | AC024051.4  |
| MCM2       | AC004223.2  |
| DDX50      | RNVU1-31    |
| RPSAP18    | AC024051.6  |
| RPL26P19   | CNTN3       |
| SLC27A4    | AC004817.2  |
| TTC3P1     | CHRNA4      |

Table S8

|            |               |
|------------|---------------|
| B3GALT6    | RNA5SP502     |
| EIF4BP6    | AC024051.2    |
| SETP14     | MYH1          |
| AL080243.4 | RNA5SP387     |
| AP001324.1 | SNORA73B      |
| RFNG       | RNY3P1        |
| HYAL2      | RNA5SP298     |
| HMGB1P1    | DNASE2B       |
| AGAP14P    | DLK1          |
| AC022968.1 | AC024051.5    |
| RPL12P6    | AC024051.11   |
| PWP2       | FP671120.2    |
| EEF1B2P3   | CR392039.1    |
| FAM171A1   | FP236383.9    |
| HNRNPCP2   | RP11-216P16.8 |
| AC092115.2 | HNRNPA1P9     |
| EIF4BP3    | AC019070.2    |
| FKBP9P1    | RNA5SP389     |
| FP565260.1 | RN7SL753P     |
| MMP15      | AC245008.1    |
| EIF4A1P2   | AL133368.1    |
| UNC50      | DCAF13P2      |
| ST13P5     | AL365209.1    |
| MMAB       | AC009495.3    |
| HNRNPA3P6  | RNA5SP335     |
| EIF4A1P4   | AC024051.12   |
| ACTBP2     | MIR2278       |
| ZNF226     | SMIM9         |
| DPAGT1     | AC013403.2    |
| THNSL2     | PHOX2A        |
| RDH14      | FAM27E2       |
| POLR2I     | LINC01391     |
| AL391244.2 | IL24          |
| NPM1P39    | AC239859.1    |
| TMED1      | RP5-1011O1.2  |
| TMEM212    | RNY4          |
| RPL12P4    | SERTM2        |
| SERBP1P5   | RNVU1-2       |
| RPSAP4     | AC087239.1    |
| RNF26      | AC115989.1    |
| RAC1P2     | AC125793.1    |
| MIR22HG    | CTD-2306M10.1 |
| TMEM147    | RNU4-2        |
| RPL7AP50   | NPTX1         |
| ABCB7      | FP236383.6    |
| MSH2       | SLC45A2       |
| MCM5       | VTRNA1-1      |
| ADH1A      | RNA5S9        |
| LRRCC1     | RNU1-11P      |
| ERO1B      | RNA5SP202     |
| AP000936.3 | RNU1-3        |
| AL354702.1 | RNU1-1        |
| PTK7       | RNA5SP370     |
| SIRT3      | RNVU1-28      |
| RPL23AP7   | CDR1          |
| ALG6       | RNVU1-18      |
| EIF3FP3    | RNU1-2        |

Table S8

|            |          |
|------------|----------|
| CFB        | RNU1-4   |
| MSTO1      | RNA5S4   |
| MCM6       | RNA5S5   |
| STAG3L1    | RNA5S6   |
| SMG1P1     | RNA5S7   |
| TOPORS     | RNA5S3   |
| TMTC4      | RNA5S2   |
| TAP2       | RNU1-88P |
| DNAJB9     | RNA5S1   |
| EIF2S2P4   | RNY1     |
| PMS1       | RNA5S12  |
| EXOSC8     | RNA5S17  |
| RAMAC      | RNA5S16  |
| G6PC3      | RNA5S10  |
| SETSIP     | RNA5S15  |
| NSMCE3     | RNA5S13  |
| TMEM43     | RNA5S8   |
| GPR87      | RNA5S11  |
| SRD5A3     | RNA5S14  |
| AC105250.1 | RNVU1-29 |
| H3-5       | RNVU1-7  |
| SMIM4      | RNU1-27P |
| LSAMP      | RNU1-28P |
| FSCN1      |          |
| COL6A3     |          |
| CYP3A5     |          |
| NR2C1      |          |
| TMEM106C   |          |
| FRG1HP     |          |
| ANAPC4     |          |
| BMI1       |          |
| ATP5ME     |          |
| NAMPTP1    |          |
| ABHD6      |          |
| ILKAP      |          |
| WFS1       |          |
| AC092490.1 |          |
| OCLNP1     |          |
| ACAD10     |          |
| ARAP3      |          |
| FBLN1      |          |
| MITD1      |          |
| CPQ        |          |
| BORCS5     |          |
| AC115223.1 |          |
| LTV1       |          |
| SESN1      |          |
| DSE        |          |
| CARM1      |          |
| FKSG70     |          |
| TCN1       |          |
| PGM5P2     |          |
| KLHL42     |          |
| PROS1      |          |
| FKSG61     |          |
| ERVK3-1    |          |
| EEF1A1P13  |          |

Table S8

|            |        |
|------------|--------|
| B3GNT3     |        |
| RPS26P31   |        |
| AL663070.2 |        |
| ANXA2P2    |        |
| PPIAP31    |        |
| RPS26P47   |        |
| RPS7P1     |        |
| PPIAP22    |        |
| FAM3D      |        |
| TP63       |        |
| RPL9P7     |        |
| GPX1P1     |        |
| EEF1A1P11  |        |
| MT-TY      |        |
| PPIC       |        |
| AC004057.1 |        |
| ATP1B3     |        |
| RPL3P4     |        |
| KRT5       |        |
| ANKRD66    |        |
| RPS3AP6    |        |
| RPP25L     |        |
| AC024293.1 |        |
| EEF1A1P9   |        |
| RPS15AP1   |        |
| FTH1P7     |        |
| RPS26P8    |        |
| ADH1B      |        |
| UBE2I      |        |
| RPS24P8    |        |
| AC004552.1 |        |
| KRT6B      |        |
| GALNT14    |        |
| KIT        |        |
| ITGA6      |        |
| AC092683.1 |        |
| HMGB1P5    |        |
| FGFR3      |        |
| AL049597.1 |        |
| TMEM183B   |        |
| SLC52A2    |        |
| NDUFA12    |        |
| H3P47      |        |
| MTRNR2L9   |        |
| DCAF13     |        |
| EEF1A1P25  |        |
| H3P6       |        |
| HMGB1P6    |        |
| RARRES1    |        |
| MST1R      |        |
| MIR205HG   |        |
| ACOT1      |        |
| MFSD5      |        |
| AC012085.1 |        |
| CLCA2      |        |
| SERPINB4   |        |
| ARSD       | Page 7 |

Table S8

|            |  |
|------------|--|
| MAD2L1BP   |  |
| DPY30      |  |
| KRT6A      |  |
| RHBDL2     |  |
| S100A4     |  |
| EMC7       |  |
| LPCAT3     |  |
| RPL13AP20  |  |
| DSG3       |  |
| APLP2      |  |
| ELMO3      |  |
| RPL7P1     |  |
| AC009245.1 |  |
| H3P16      |  |
| SVBP       |  |
| THYN1      |  |
| IFNGR1     |  |
| MRPS21     |  |
| RPS7P11    |  |
| SRSF2      |  |
| AQP3       |  |
| ERAL1      |  |
| TEX264     |  |
| SLC44A3    |  |
| FCGRT      |  |
| AC106795.1 |  |
| PHF14      |  |
| CYP2J2     |  |
| RPS2P55    |  |
| EDEM2      |  |
| ITGB6      |  |
| CD14       |  |
| JPT1       |  |
| FTLP3      |  |
| ATP10B     |  |
| HNRNPA1P7  |  |
| SELENOS    |  |
| BZW1P2     |  |
| UQCC2      |  |
| RPL7P9     |  |
| RPS26P6    |  |
| MINPP1     |  |
| PLL        |  |
| TBL2       |  |
| PDIA3      |  |
| DDAH2      |  |
| ITM2C      |  |
| RPN2       |  |
| PSPC1      |  |
| TUBAP2     |  |
| NPC1       |  |
| EEF1A1P19  |  |
| ECI1       |  |
| LAMC1      |  |
| SLC35B2    |  |
| ARMT1      |  |
| EXOSC9     |  |



Table S8

|            |  |
|------------|--|
| CLDN1      |  |
| HIBCH      |  |
| FMO5       |  |
| RPL7P32    |  |
| SNHG6      |  |
| PRDX4      |  |
| RPS2P46    |  |
| PRPF39     |  |
| PSME1      |  |
| SCYL3      |  |
| AC064799.1 |  |
| UBBP4      |  |
| MANF       |  |
| UXS1       |  |
| PAPSS2     |  |
| SPINT2     |  |
| RPL7AP6    |  |
| RPL21P28   |  |
| TST        |  |
| RMDN3      |  |
| TUSC3      |  |
| METTL17    |  |
| SCPEP1     |  |
| NOMO2      |  |
| PBXIP1     |  |
| PYCARD     |  |
| CTSC       |  |
| CD9        |  |
| HLA-A      |  |
| PRMT7      |  |
| CDS2       |  |
| CCDC59     |  |
| AC113935.1 |  |
| SMC4       |  |
| LMAN2      |  |
| FANCI      |  |
| HNRNPA1P48 |  |
| RPL14P1    |  |
| AL135745.1 |  |
| GAS6       |  |
| GPN1       |  |
| PGRMC1     |  |
| ATRAID     |  |
| TSPAN6     |  |
| MTCO2P12   |  |
| CCT6A      |  |
| HEXB       |  |
| FKBP9      |  |
| TMCO1      |  |
| CTSH       |  |
| MFSD11     |  |
| HLA-F      |  |
| ETHE1      |  |
| SNX14      |  |
| DNAJB11    |  |
| PFKM       |  |
| ASB3       |  |

Table S8

|            |         |
|------------|---------|
| HLA-H      |         |
| EEF1A1P4   |         |
| LAMB3      |         |
| BCAP31     |         |
| UPK1B      |         |
| SLC39A6    |         |
| GUSB       |         |
| ITM2B      |         |
| NDUFAB1    |         |
| PPIAL4G    |         |
| C1QBP      |         |
| PTDSS1     |         |
| RUFY2      |         |
| KRT8       |         |
| KTN1       |         |
| AC090498.1 |         |
| SDHA       |         |
| DSC3       |         |
| CXADR      |         |
| SNRPD2     |         |
| KDSR       |         |
| HLA-C      |         |
| UFD1       |         |
| THOC3      |         |
| HADH       |         |
| HSP90B1    |         |
| ATP6AP1    |         |
| HSP90AA1   |         |
| RRAGA      |         |
| LRRC8D     |         |
| ATP6AP2    |         |
| PSMD1      |         |
| EBPL       |         |
| ARMC1      |         |
| RPL22P1    |         |
| TMEM9      |         |
| AGR2       |         |
| GBA        |         |
| NPTN       |         |
| UQCRC1     |         |
| PSENE1     |         |
| CUEDC1     |         |
| CHPF       |         |
| MAPKAPK3   |         |
| BX679664.3 |         |
| PLS1       |         |
| CALR       |         |
| AC026403.1 |         |
| CLK1       |         |
| PRSS8      |         |
| RCN2       |         |
| SNRPA1     |         |
| RRM1       |         |
| VAR1       |         |
| ADAM28     |         |
| AC233968.1 |         |
| CDH1       | Page 10 |

Table S8

|            |  |
|------------|--|
| CTNNAL1    |  |
| RPL13P12   |  |
| BCAT2      |  |
| SMARCAD1   |  |
| IL10RB     |  |
| ACSF2      |  |
| CAMK2G     |  |
| CHKA       |  |
| PLTP       |  |
| GFM2       |  |
| ARL3       |  |
| RPAP2      |  |
| SNHG1      |  |
| ATP5F1B    |  |
| AC233699.1 |  |
| RPN1       |  |
| RPL10P16   |  |
| ACOT2      |  |
| GTF2H2B    |  |
| GAA        |  |
| CD81       |  |
| NOMO1      |  |
| TWF2       |  |
| ABCE1      |  |
| GTF2H2C    |  |
| CHPT1      |  |
| RPL13AP5   |  |
| C5orf15    |  |
| LUC7L3     |  |
| RARS1      |  |
| NT5DC1     |  |
| SURF1      |  |
| PRDX1      |  |
| LRG1       |  |
| ERMP1      |  |
| CKMT1A     |  |
| RPS2P5     |  |
| ITFG1      |  |
| CRYM       |  |
| AL592114.1 |  |
| CEACAM5    |  |
| LRP5       |  |
| TAP1       |  |
| F11R       |  |
| SRSF11     |  |
| AKAP1      |  |
| HSD17B13   |  |
| FAT1       |  |
| ANXA4      |  |
| HSD17B12   |  |
| TXNDC15    |  |
| RTN3       |  |
| KIFAP3     |  |
| CAPG       |  |
| DNAJC1     |  |
| ARF5       |  |
| GCLC       |  |

Table S8

|          |  |
|----------|--|
| SDF4     |  |
| TMEM59   |  |
| KRT19    |  |
| CDH3     |  |
| HLA-B    |  |
| GSTK1    |  |
| TM9SF2   |  |
| ADRM1    |  |
| PCNA     |  |
| MAN1B1   |  |
| ANKRD36  |  |
| WDR61    |  |
| RCN1     |  |
| MPP7     |  |
| PDIA6    |  |
| KRT15    |  |
| FHL2     |  |
| DDOST    |  |
| TSPAN13  |  |
| AGL      |  |
| ITGAV    |  |
| SLC35A2  |  |
| ASCC3    |  |
| TRAPPC3  |  |
| GSS      |  |
| GRN      |  |
| RASA1    |  |
| STAM2    |  |
| PRELID1  |  |
| SMG1P4   |  |
| PRKAR2B  |  |
| NBEAL1   |  |
| ERLEC1   |  |
| RPL7AP66 |  |
| GNS      |  |
| CFH      |  |
| P4HB     |  |
| CD47     |  |
| CTSB     |  |
| GLRX5    |  |
| RPS21    |  |
| AMFR     |  |
| MGST1    |  |
| B2M      |  |
| HACD3    |  |
| CLDN4    |  |
| BCAP29   |  |
| WASHC2C  |  |
| APP      |  |
| FDFT1    |  |
| VPS25    |  |
| ATP1A1   |  |
| ALDH7A1  |  |
| PRXL2A   |  |
| ADAM15   |  |
| SREK1    |  |
| CD151    |  |

Table S8

|            |  |
|------------|--|
| TACSTD2    |  |
| ARL6IP1    |  |
| TOR3A      |  |
| MDH1       |  |
| MORN2      |  |
| ATP2C1     |  |
| OS9        |  |
| MIPEP      |  |
| AKR1A1     |  |
| DSG2       |  |
| SELENBP1   |  |
| ATP5MG     |  |
| TSPAN1     |  |
| PPIB       |  |
| OSBPL3     |  |
| TMEM50B    |  |
| MBOAT2     |  |
| SYNGR2     |  |
| S100A6     |  |
| WDR33      |  |
| SLC44A2    |  |
| SOD1       |  |
| HNRNPA1P10 |  |
| ZMPSTE24   |  |
| TK2        |  |
| ST14       |  |
| TMEM9B     |  |
| PTTG1IP    |  |
| AC087473.1 |  |
| EPCAM      |  |
| ANXA1      |  |
| MAT2B      |  |
| KARS1      |  |
| EFTUD2     |  |
| TMEM87A    |  |
| GPD2       |  |
| RPL21P16   |  |
| SLC38A10   |  |
| PSMB3      |  |
| RBM5       |  |
| EXOC1      |  |
| ARPC3      |  |
| MTDH       |  |
| RETREG2    |  |
| REEP5      |  |
| ERBB3      |  |
| RBM6       |  |
| ATP6V0D1   |  |
| MAP3K5     |  |
| ALDH2      |  |
| TUFM       |  |
| RPS26      |  |
| PSAP       |  |
| ATP5MC3    |  |
| CD63       |  |
| POR        |  |
| UBXN1      |  |

Table S8

|           |  |
|-----------|--|
| PGD       |  |
| ALDH1A1   |  |
| DSP       |  |
| LRPAP1    |  |
| ENO1      |  |
| PTPRK     |  |
| GALNT7    |  |
| TOP2B     |  |
| SARAF     |  |
| ATXN10    |  |
| CCNDBP1   |  |
| YWHAB     |  |
| HSPA5     |  |
| QSOX1     |  |
| EEF1A1P5  |  |
| SRI       |  |
| OCIAD1    |  |
| EXOC3     |  |
| DDX19A    |  |
| EMC4      |  |
| SDC1      |  |
| CCT5      |  |
| HTATIP2   |  |
| MMP14     |  |
| PKM       |  |
| ANXA3     |  |
| SLC39A7   |  |
| TUBA1A    |  |
| ARPC1B    |  |
| TAGLN2    |  |
| ATP5F1A   |  |
| USP48     |  |
| PCYOX1    |  |
| HMGB1     |  |
| PCMTD2    |  |
| SRSF3     |  |
| CLSTN1    |  |
| GSN       |  |
| PPP1CA    |  |
| DDB1      |  |
| NUCB2     |  |
| LRIG1     |  |
| HNRNPAB   |  |
| CLPTM1L   |  |
| SMARCA2   |  |
| LGALS3BP  |  |
| ARPC5     |  |
| PYGL      |  |
| ANKRD36B  |  |
| RTN4      |  |
| PSMD4     |  |
| NDUFV1    |  |
| HNRNPA2B1 |  |
| ANPEP     |  |
| PLD3      |  |
| NRBP1     |  |
| IFT57     |  |

Table S8

|        |  |
|--------|--|
| CTNNB1 |  |
| COPB1  |  |
| ACSL5  |  |
| DDX5   |  |
| ACTG1  |  |
| COX4I1 |  |
| SRPRA  |  |
| GDE1   |  |
| SEPHS2 |  |
| CAST   |  |
| PRKCSH |  |
| LDHB   |  |
| HNRNPL |  |
| TSPYL1 |  |
| NFE2L1 |  |
| EIF3C  |  |
| EIF3CL |  |
| SFPQ   |  |
| DHCR24 |  |
