# Supplementary material for: Transcriptome of nasopharyngeal samples from COVID-19 patients and a comparative analysis with other SARS-CoV-2 infection models reveal disparate host responses against SARS-CoV-2
Source: Springer Nature journal article supplement (doi:10.1186/s12967-020-02695-0), 2021-01-07
Supplement: MOESM11 [file 18747950]

## Additional file 11: Sources of the data used in this study.

## RNA-seq data generated from Nasopharyngeal samples of Bangladeshi COVID-19 patients

| Sample ID | Specimen            | Virus: GISAID Accession | Human RNA-seq: GEO accession | Total Read No. (R1) | Total Read No. (R2) | Mapped Read No. (Human GRCh38) | Sequencing technology | Virus Assembly method | Lineage | Clade |
|-----------|---------------------|-------------------------|------------------------------|---------------------|---------------------|--------------------------------|-----------------------|-----------------------|---------|-------|
| S2        | Nasopharyngeal swab | EPI_ISL_450340          | GSM4667504                   | 10144042            | 10144042            | 8354586                        | Illumina NextSeq500   | MEGAHIT v1.1.3        | A       | S     |
| S3        | Nasopharyngeal swab | EPI_ISL_450341          | GSM4667505                   | 9276172             | 9276172             | 6542386                        | Illumina NextSeq500   | MEGAHIT v1.1.3        | A       | S     |
| S4        | Nasopharyngeal swab | EPI_ISL_450342          | GSM4667506                   | 9029322             | 9029322             | 4788596                        | Illumina NextSeq500   | MEGAHIT v1.1.3        | A       | S     |
| S9        | Nasopharyngeal swab | EPI_ISL_450345          | GSM4667507                   | 8234222             | 8234222             | 4170828                        | Illumina NextSeq500   | MEGAHIT v1.1.3        | A       | S     |
|           |                     |                         | <b>GSE ID</b>                |                     |                     |                                |                       |                       |         |       |
|           |                     |                         | <b>GSE154244</b>             |                     |                     |                                |                       |                       |         |       |

## Publicly available data used in this study

| Nasal Control (WT) Healthy Data                                                                                                                                                                                                                                                                                     |               |               |               |               |                               |                          |                             |
|---------------------------------------------------------------------------------------------------------------------------------------------------------------------------------------------------------------------------------------------------------------------------------------------------------------------|---------------|---------------|---------------|---------------|-------------------------------|--------------------------|-----------------------------|
| GEO Accession                                                                                                                                                                                                                                                                                                       | SAMPLE-1 (WT) | SAMPLE-2 (WT) | SAMPLE-3 (WT) | SAMPLE-4 (WT) |                               |                          |                             |
| <b>GSE97668</b>                                                                                                                                                                                                                                                                                                     | GSM2574998    | GSM2574999    | GSM2575000    | GSM2575001    | disease status: Non-asthmatic | age: Adult. No Treatment | cell type: Nasal epithelial |
| Citation: Heymann PW, Nguyen HT, Steinke JW, Turner RB et al. Rhinovirus infection results in stronger and more persistent genomic dysregulation: Evidence for altered innate immune response in asthmatics at baseline, early in infection, and during convalescence. PLoS One 2017;12(5):e0178096. PMID: 28552993 |               |               |               |               |                               |                          |                             |

## Infected Cell Data

| GEO Accession    |                         |       | GEO: GSM (Sample ID) |                      |
|------------------|-------------------------|-------|----------------------|----------------------|
| <b>GSE147507</b> | ing_GSE147507_GSM44624  | Lung  | GSM4462415           | Lung-Postmortem      |
|                  | Lung_GSE147507_GSM44624 | Lung  | GSM4462416           | Lung-Postmortem      |
|                  |                         |       |                      |                      |
| <b>GSE150316</b> | ing_GSE150316_GSM45465  | Lung  | GSM4546576           | Lung-Autopsy         |
|                  | Lung_GSE150316_GSM45465 | Lung  | GSM4546581           | Lung-Autopsy         |
|                  | Lung_GSE150316_GSM45465 | Lung  | GSM4546586           | Lung-Autopsy         |
|                  | Lung_GSE150316_GSM45465 | Lung  | GSM4546589           | Lung-Autopsy         |
|                  | Lung_GSE150316_GSM45465 | Lung  | GSM4546596           | Lung-Autopsy         |
|                  |                         |       |                      |                      |
| <b>GSE148729</b> | LU3_GSE148729_GSM4477   | Calu3 | GSM4477962           | Lung-epithelial-cell |
|                  | CALU3_GSE148729_GSM4477 | Calu3 | GSM4477963           | Lung-epithelial-cell |
|                  |                         |       |                      |                      |
| <b>GSE147507</b> | NHBE_GSE147507_GSM44323 | NHBE  | GSM4432381           | Bronchial-Epithelial |
|                  | NHBE_GSE147507_GSM44323 | NHBE  | GSM4432382           | Bronchial-Epithelial |
|                  | NHBE_GSE147507_GSM44323 | NHBE  | GSM4432383           | Bronchial-Epithelial |
