# Supplementary material for: Transcriptome of nasopharyngeal samples from COVID-19 patients and a comparative analysis with other SARS-CoV-2 infection models reveal disparate host responses against SARS-CoV-2
Source: Springer Nature journal article supplement (doi:10.1186/s12967-020-02695-0), 2021-01-07

**Additional file 12 : Per base sequence quality reports of the generated RNA-seq reads of the four COVID-19 infected nasal samples used in this study.**

**A. Sample S2**

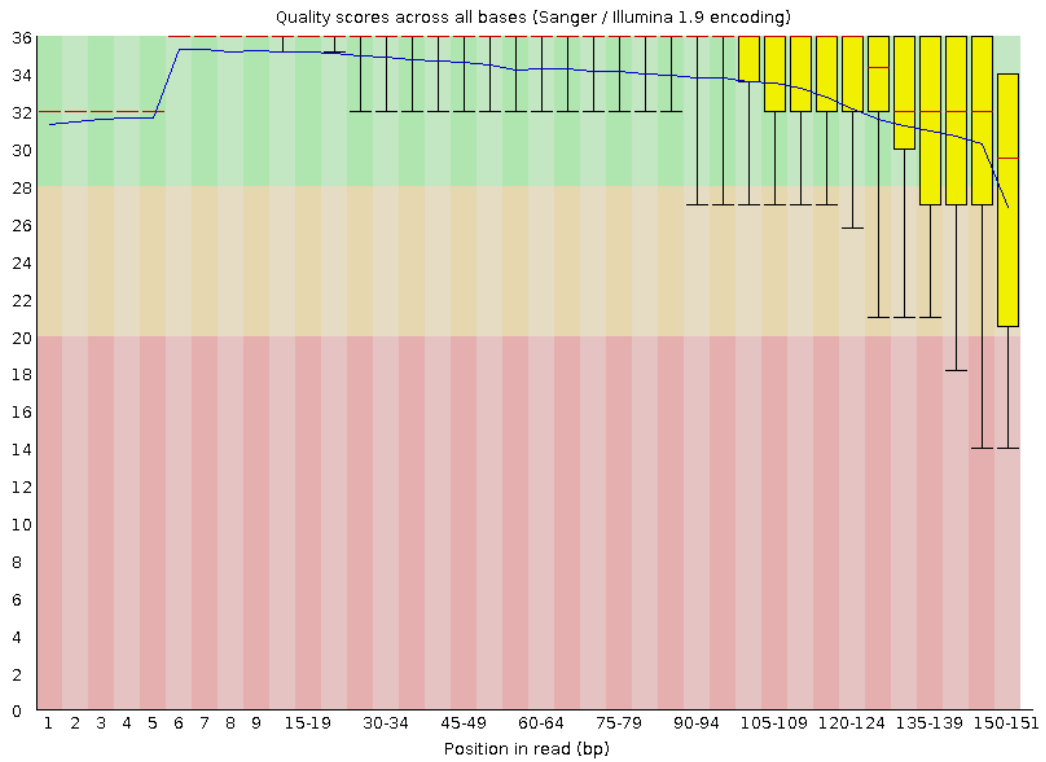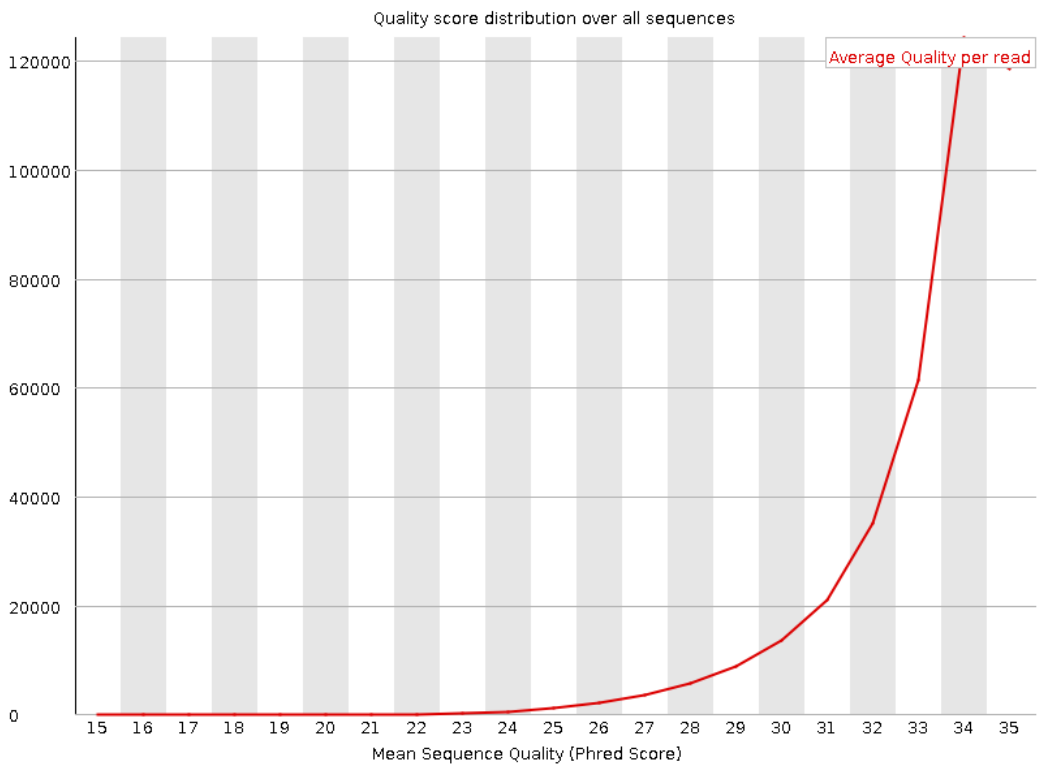

## B. Sample S3

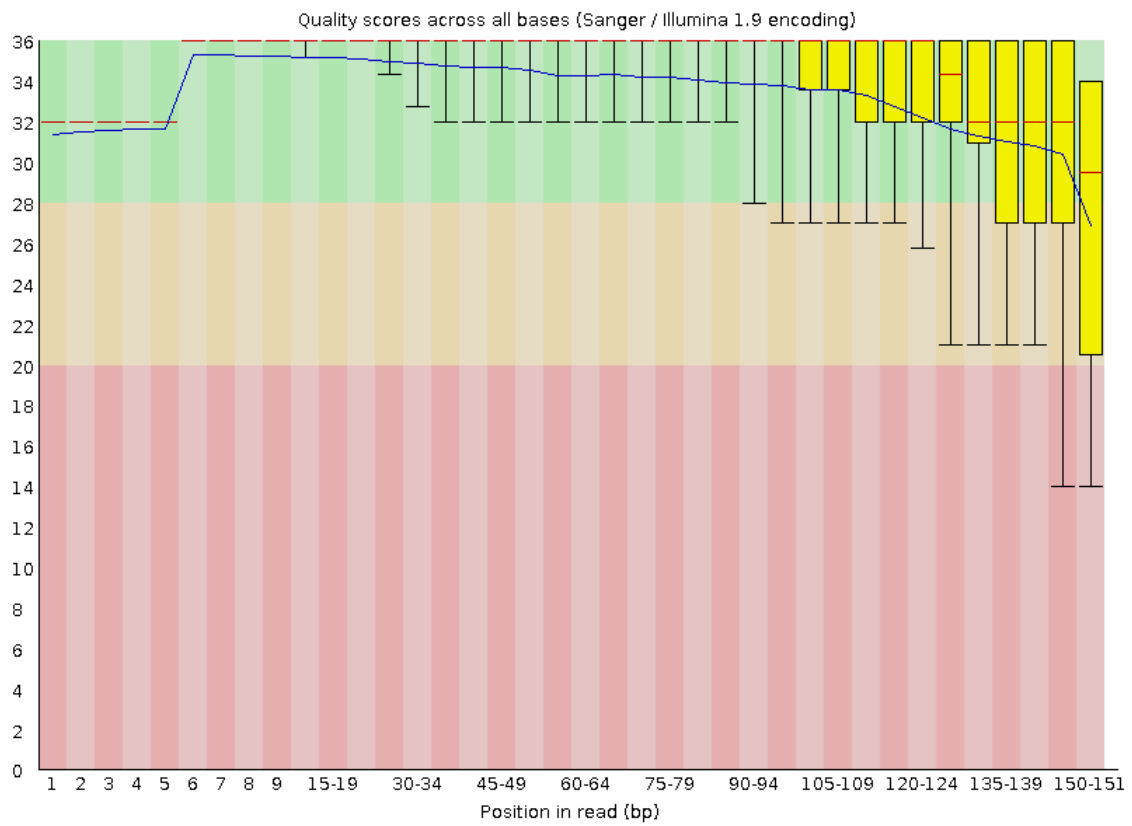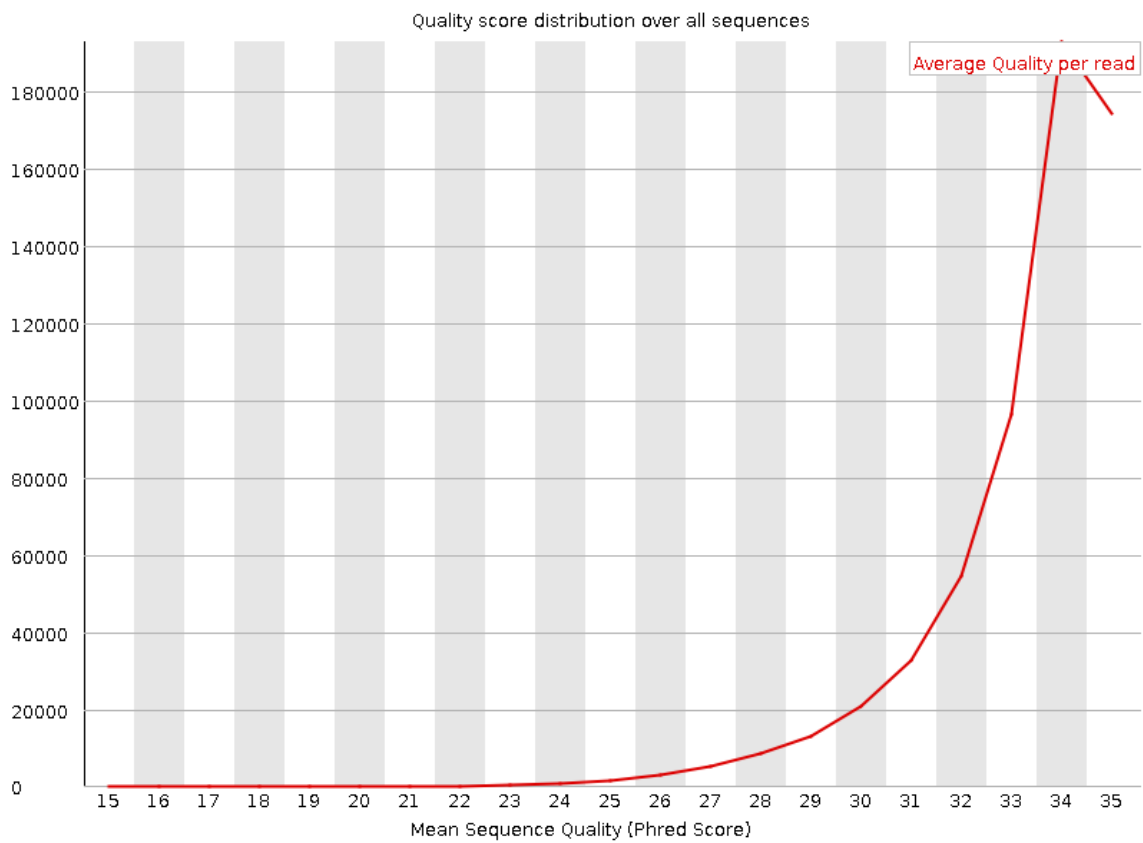

### C. Sample S4

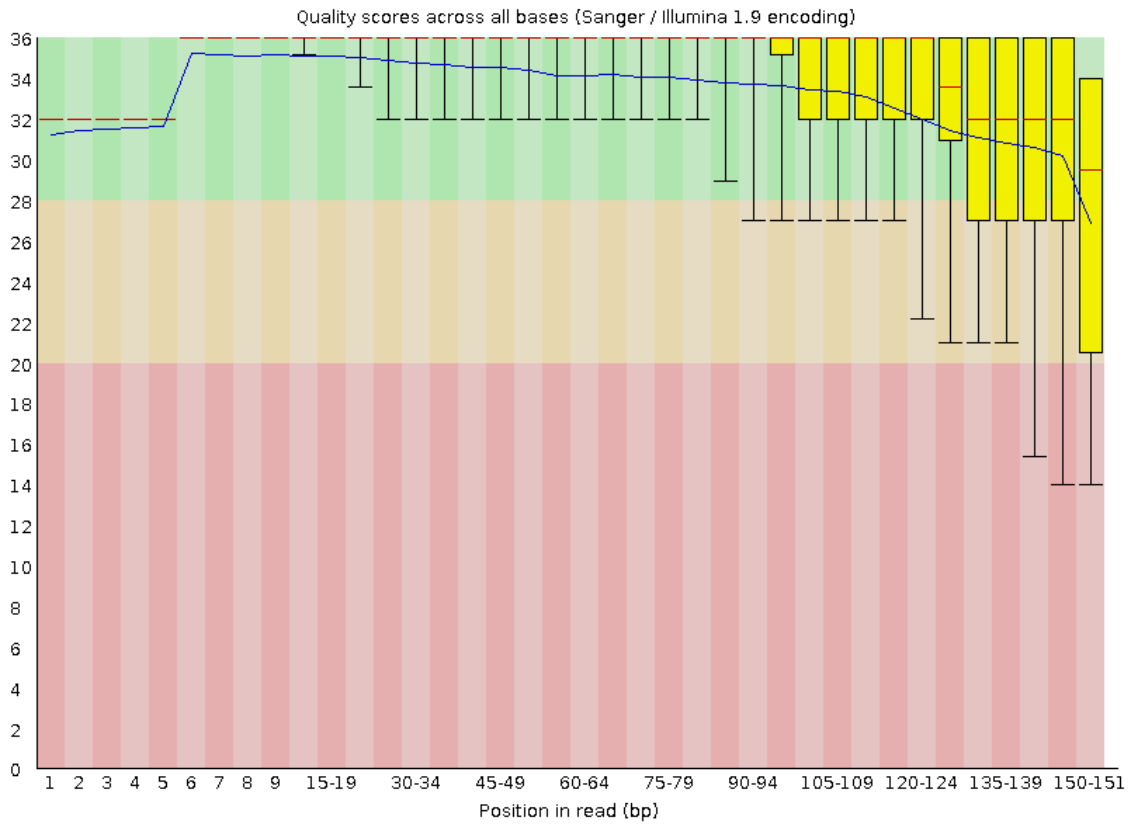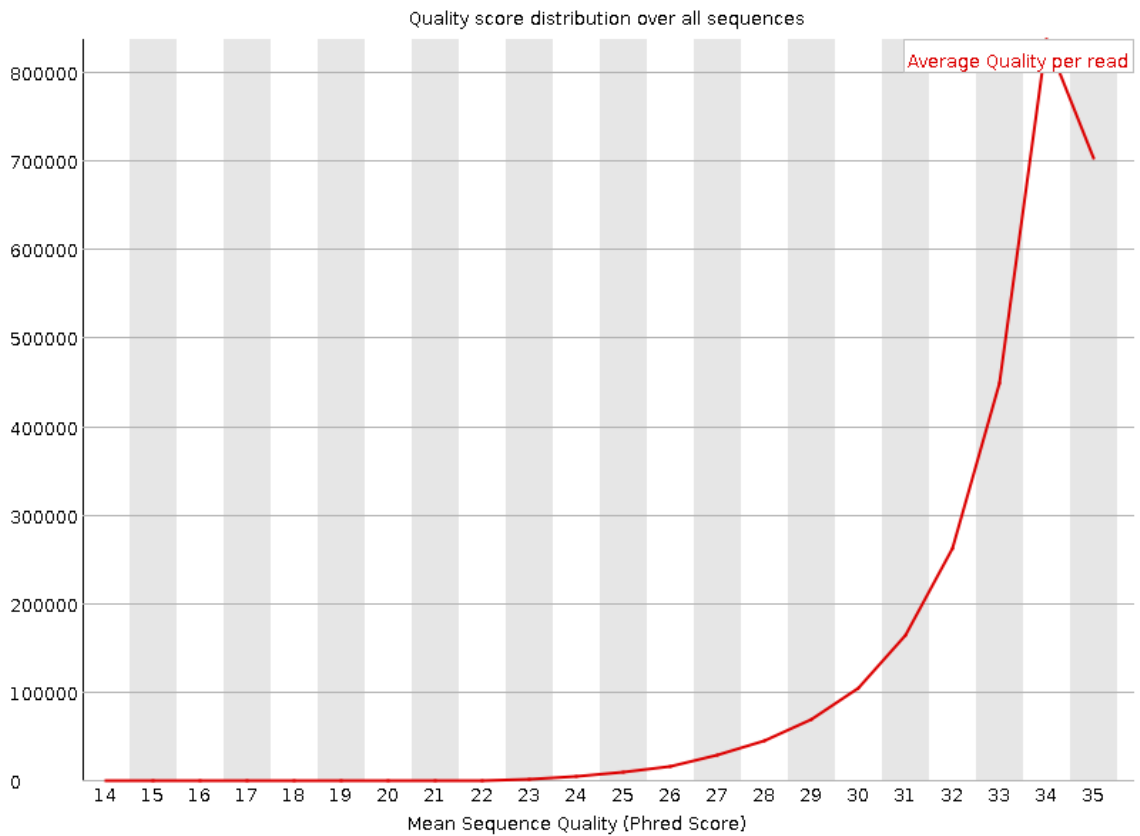

## D. Sample S9

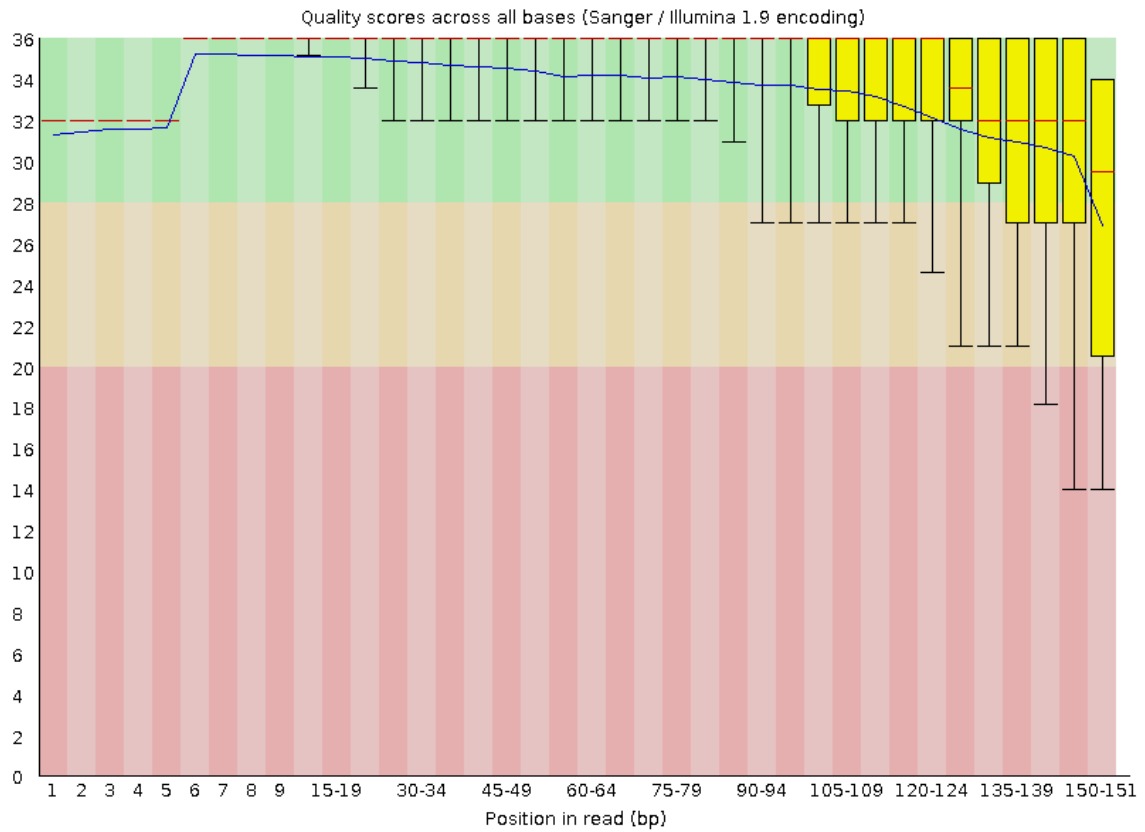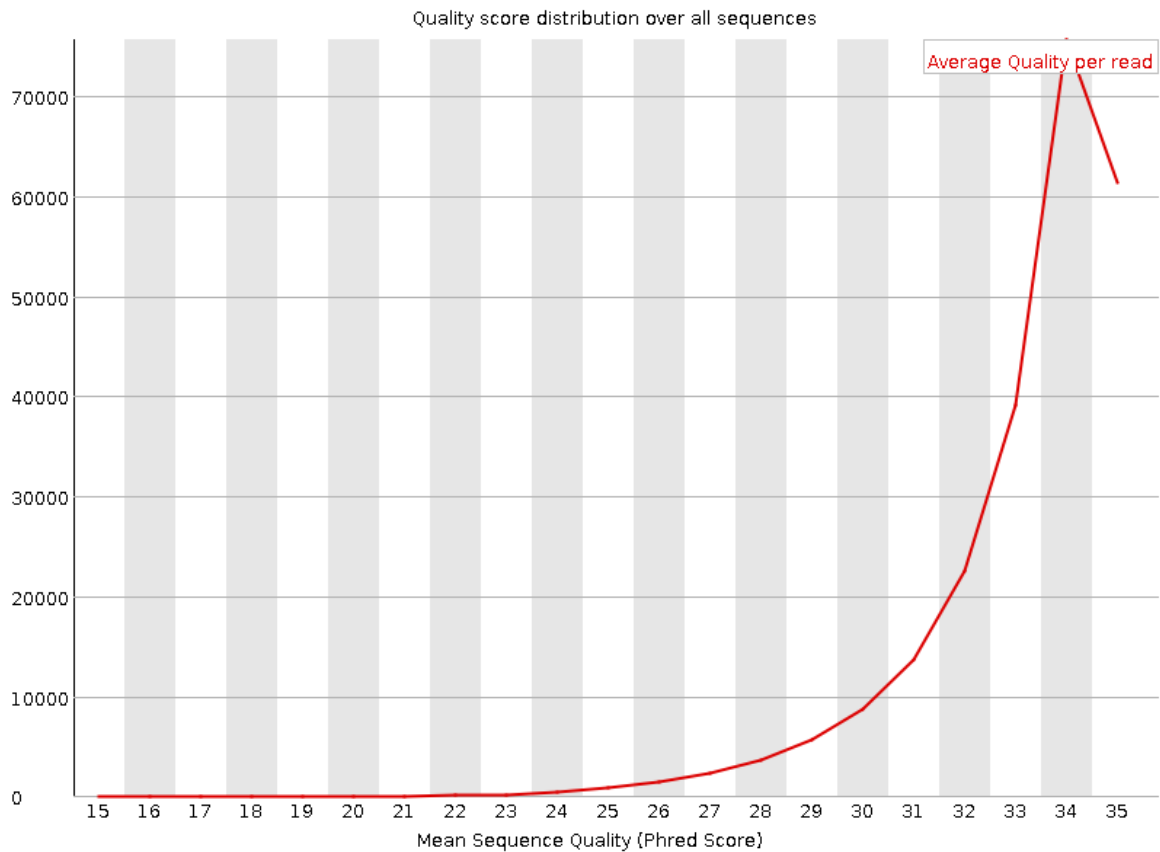

Supplement: MOESM12 [file 18747950]
